# Supplementary material for: Frequent Co-Expression of miRNA-5p and -3p Species and Cross-Targeting in Induced Pluripotent Stem Cells
Source: PubMed Central journal article supplement — Int J Med Sci. 2014 Jun 5;11(8):824–33. doi: 10.7150/ijms.8358 (PMC4057479; doi:10.7150/ijms.8358), 2014-06-05
Supplement: ijmsv11p0824s1.pdf [file ijmsv11p0824s1.pdf]

**Supplementary Table 1: Stem-loop RT-PCR primers**

| <b>Stem-loop RT primers (5'-3')</b>          |                                                                          |
|----------------------------------------------|--------------------------------------------------------------------------|
| hsa-miR-515-5p-RT                            | GTC GTA TCC AGT GCA GGG TCC GAG GTA TTC GCA CTG GAT<br>ACG ACC AGA AAG T |
| hsa-miR-515-3p-RT                            | GTC GTA TCC AGT GCA GGG TCC GAG GTA TTC GCA CTG GAT<br>ACG ACA ACG CTC C |
| hsa-mir-519e-5p-RT                           | GTC GTA TCC AGT GCA GGG TCC GAG GTA TTC GCA CTG GAT<br>ACG ACG AAA GTG C |
| hsa-mir-519e-3p-RT                           | GTC GTA TCC AGT GCA GGG TCC GAG GTA TTC GCA CTG GAT<br>ACG ACA ACA CTC T |
| hsa-miR-214-5p-RT                            | GTC GTA TCC AGT GCA GGG TCC GAG GTA TTC GCA CTG GAT<br>ACG ACG CAC AGC A |
| hsa-miR-214-3p-RT                            | GTC GTA TCC AGT GCA GGG TCC GAG GTA TTC GCA CTG GAT<br>ACG ACA CTG CCT G |
| hsa-miR-424-5p-RT                            | GTC GTA TCC AGT GCA GGG TCC GAG GTA TTC GCA CTG GAT<br>ACG ACT TCA AAA C |
| hsa-miR-424-3p-RT                            | GTC GTA TCC AGT GCA GGG TCC GAG GTA TTC GCA CTG GAT<br>ACG ACA TAG CAG C |
| <b>microRNA specific PCR primers (5'-3')</b> |                                                                          |
| hsa-miR-515-5p                               | CGG CGG TTC TCC AAA AGA AAG CA                                           |
| hsa-miR-515-3p                               | CGG CGA GTG CCT TCT TTT GGA                                              |
| hsa-mir-519e-5p                              | CGG CGA TTC TCC AAA AGG GAG C                                            |
| hsa-mir-519e-3p                              | CGG CGC AAG TGC CTC CTT TTA G                                            |
| hsa-miR-214-5p                               | CGG CGT GCC TGT CTA CAC TTG                                              |
| hsa-miR-214-3p                               | CGG ACA GCA GGC ACA GAC A                                                |
| hsa-miR-424-5p                               | CGG GCA GCA GCA ATT CAT GT                                               |
| hsa-miR-424-3p                               | CGC AAA ACG TGA GGC GCT                                                  |
| U6-F                                         | CTC GCT TCG GCA GCA CA                                                   |
| U6-R                                         | AAC GCT TCA CGA ATT TGC GT                                               |
| Universal reverse primer                     | CCA GTG CAG GGT CCG AGG TA                                               |

Supplementary Table 2. miRNA altered in expression levels in stem cells

**A. miRNAs altered in iPSC relative to ESC**

|    | Activated         |                                | Up-regulated    |                                | Shutdown     |                                | Down-regulated  |                                |
|----|-------------------|--------------------------------|-----------------|--------------------------------|--------------|--------------------------------|-----------------|--------------------------------|
|    | miRNA             | Log <sub>2</sub> (fold change) | miRNA           | Log <sub>2</sub> (fold change) | miRNA        | Log <sub>2</sub> (fold change) | miRNA           | Log <sub>2</sub> (fold change) |
| 1  | HSA-MIR-502-3P    | 9.05477652                     | HSA-MIR-199A-5P | 3.289988274                    | HSA-MIR-636  | -4.973121579                   | HSA-MIR-3615    | -1.680011726                   |
| 2  | HSA-MIR-656       | 6.91477652                     | HSA-MIR-199A-3P | 2.913321607                    | HSA-MIR-664* | -3.518121579                   | HSA-MIR-548D-3P | -1.575011726                   |
| 3  | HSA-MIR-130A*     | 6.758109853                    | HSA-MIR-154*    | 2.771654941                    | HSA-MIR-585  | -2.218121579                   | HSA-LET-7F-2*   | -1.560011726                   |
| 4  | HSA-MIR-378*      | 6.371443186                    | HSA-MIR-199B-5P | 2.589988274                    |              |                                | HSA-MIR-4279    | -1.520011726                   |
| 5  | HSA-MIR-648       | 5.41477652                     | HSA-MIR-411     | 2.213321607                    |              |                                |                 |                                |
| 6  | HSA-MIR-589       | 3.91477652                     | HSA-MIR-432     | 2.129988274                    |              |                                |                 |                                |
| 7  | HSA-MIR-196B      | 2.51477652                     | HSA-MIR-181C    | 2.081654941                    |              |                                |                 |                                |
| 8  | HSA-MIR-4328      | 2.311443186                    | HSA-MIR-369-3P  | 1.998321607                    |              |                                |                 |                                |
| 9  | HSA-MIR-451       | 2.108109853                    | HSA-MIR-651     | 1.973321607                    |              |                                |                 |                                |
| 10 | HSA-MIR-1297      | 2.03477652                     | HSA-MIR-487B    | 1.898321607                    |              |                                |                 |                                |
| 11 | HSA-MIR-548V      | 1.56477652                     | HSA-MIR-410     | 1.798321607                    |              |                                |                 |                                |
| 12 | HSA-MIR-181C*     | 1.52477652                     | HSA-MIR-181B    | 1.584988274                    |              |                                |                 |                                |
| 13 |                   |                                | HSA-MIR-329     | 1.506654941                    |              |                                |                 |                                |
|    | <b>12</b>         |                                | <b>13</b>       |                                | <b>3</b>     |                                | <b>4</b>        |                                |
|    | <b>Total = 32</b> |                                |                 |                                |              |                                |                 |                                |

**B. miRNAs altered in iPSC relative to MSC**

|    | Activated       |                                | Up-regulated |                                | Shutdown       |                                | Down-regulated      |                                |
|----|-----------------|--------------------------------|--------------|--------------------------------|----------------|--------------------------------|---------------------|--------------------------------|
|    | miRNA           | Log <sub>2</sub> (fold change) | miRNA        | Log <sub>2</sub> (fold change) | miRNA          | Log <sub>2</sub> (fold change) | miRNA               | Log <sub>2</sub> (fold change) |
| 1  | HSA-MIR-302F    | 13.15477652                    | HSA-MIR-302D | 13.04792715                    | HSA-MIR-10A    | -12.45851603                   | HSA-LET-7I          | -10.99207285                   |
| 2  | HSA-MIR-1231    | 11.40810985                    | HSA-MIR-367  | 11.66459382                    | HSA-MIR-139-5P | -10.19351603                   | HSA-LET-7G          | -9.538739512                   |
| 3  | HSA-MIR-302A*   | 11.06810985                    | HSA-MIR-302C | 9.899593821                    | HSA-MIR-143    | -9.473516032                   | HSA-MIR-199A<br>-5P | -8.530406179                   |
| 4  | HSA-MIR-1290    | 10.89810985                    | HSA-MIR-135A | 8.932927154                    | HSA-LET-7D     | -9.083516032                   | HSA-MIR-199A<br>-3P | -8.457072846                   |
| 5  | HSA-MIR-200C    | 10.70144319                    | HSA-MIR-518F | 7.177927154                    | HSA-MIR-22*    | -7.923516032                   | HSA-LET-7F          | -8.120406179                   |
| 6  | HSA-MIR-3665    | 10.39144319                    | HSA-MIR-517B | 6.777927154                    | HSA-MIR-1306   | -6.408516032                   | HSA-LET-7A          | -7.933739512                   |
| 7  | HSA-MIR-302C*   | 9.658109853                    | HSA-MIR-135B | 6.499593821                    | HSA-LET-7D*    | -6.403516032                   | HSA-MIR-199B<br>-5P | -7.690406179                   |
| 8  | HSA-MIR-520C-3P | 8.621443186                    | HSA-MIR-141  | 6.446260488                    | HSA-MIR-3660   | -5.818516032                   | HSA-LET-7C          | -7.603739512                   |
| 9  | HSA-MIR-302B*   | 8.611443186                    | HSA-MIR-335* | 6.177927154                    | HSA-MIR-98     | -5.808516032                   | HSA-LET-7E          | -7.492072846                   |
| 10 | HSA-MIR-517A    | 8.598109853                    | HSA-MIR-372  | 5.261260488                    | HSA-MIR-876-5P | -4.248516032                   | HSA-MIR-137         | -7.203739512                   |
| 11 | HSA-MIR-3670    | 8.26477652                     | HSA-MIR-96   | 5.239593821                    | HSA-MIR-4268   | -3.883516032                   | HSA-MIR-29A         | -6.937072846                   |
| 12 | HSA-MIR-187     | 8.101443186                    | HSA-MIR-429  | 5.204593821                    | HSA-MIR-664*   | -3.033516032                   | HSA-MIR-145         | -6.200406179                   |
| 13 | HSA-MIR-182     | 7.91477652                     | HSA-MIR-520H | 5.201260488                    | HSA-MIR-10A*   | -2.973516032                   | HSA-MIR-99A         | -6.082072846                   |
| 14 | HSA-MIR-296-3P  | 7.89477652                     | HSA-MIR-520G | 5.174593821                    | HSA-MIR-506    | -2.778516032                   | HSA-MIR-100         | -6.072072846                   |
| 15 | HSA-MIR-550A*   | 7.828109853                    | HSA-MIR-18A  | 5.079593821                    | HSA-MIR-567    | -2.428516032                   | HSA-MIR-196A        | -5.812072846                   |
| 16 | HSA-MIR-18B     | 7.711443186                    | HSA-MIR-3175 | 4.871260488                    | HSA-MIR-24-1*  | -2.193516032                   | HSA-MIR-196B        | -5.688739512                   |

|    |                 |             |                    |             |                |              |                     |              |
|----|-----------------|-------------|--------------------|-------------|----------------|--------------|---------------------|--------------|
| 17 | HSA-MIR-373     | 7.57477652  | HSA-MIR-335        | 4.171260488 | HSA-MIR-218-2* | -1.613516032 | HSA-LET-7F-2*       | -5.640406179 |
| 18 | HSA-MIR-515-5P  | 7.388109853 | HSA-MIR-205        | 4.134593821 |                |              | HSA-MIR-29B         | -5.588739512 |
| 19 | HSA-MIR-150     | 7.348109853 | HSA-MIR-935        | 4.122927154 |                |              | HSA-MIR-31          | -5.380406179 |
| 20 | HSA-MIR-3180-3P | 7.11477652  | HSA-MIR-598        | 4.121260488 |                |              | HSA-MIR-22          | -5.193739512 |
| 21 | HSA-MIR-519A    | 6.921443186 | HSA-MIR-106A       | 4.116260488 |                |              | HSA-MIR-31*         | -5.182072846 |
| 22 | HSA-MIR-3648    | 6.918109853 | HSA-MIR-526B       | 4.049593821 |                |              | HSA-MIR-27A         | -4.660406179 |
| 23 | HSA-MIR-518C    | 6.618109853 | HSA-MIR-29B-2*     | 3.831260488 |                |              | HSA-MIR-193A<br>-5P | -4.615406179 |
| 24 | HSA-MIR-371-5P  | 6.591443186 | HSA-MIR-766        | 3.831260488 |                |              | HSA-MIR-214         | -4.365406179 |
| 25 | HSA-MIR-9       | 6.511443186 | HSA-MIR-421        | 3.827927154 |                |              | HSA-MIR-155         | -4.342072846 |
| 26 | HSA-MIR-4303    | 6.498109853 | HSA-MIR-520E       | 3.821260488 |                |              | HSA-MIR-424*        | -4.215406179 |
| 27 | HSA-MIR-3147    | 6.391443186 | HSA-MIR-17         | 3.816260488 |                |              | HSA-MIR-21          | -4.025406179 |
| 28 | HSA-MIR-1180    | 6.32477652  | HSA-MIR-20A        | 3.697927154 |                |              | HSA-MIR-24          | -3.940406179 |
| 29 | HSA-MIR-4282    | 6.05477652  | HSA-MIR-18A*       | 3.617927154 |                |              | HSA-MIR-424         | -3.883739512 |
| 30 | HSA-MIR-449B*   | 6.038109853 | HSA-MIR-126        | 3.566260488 |                |              | HSA-MIR-181C        | -3.833739512 |
| 31 | HSA-MIR-656     | 5.74477652  | HSA-MIR-301A       | 3.539593821 |                |              | HSA-MIR-34A         | -3.593739512 |
| 32 | HSA-MIR-3605-5P | 5.47477652  | HSA-MIR-489        | 3.514593821 |                |              | HSA-MIR-152         | -3.495406179 |
| 33 | HSA-MIR-4266    | 5.458109853 | HSA-MIR-19B        | 3.436260488 |                |              | HSA-MIR-218         | -3.442072846 |
| 34 | HSA-MIR-33A     | 5.21477652  | HSA-MIR-532<br>-3P | 3.429593821 |                |              | HSA-MIR-221*        | -3.382072846 |
| 35 | HSA-MIR-520A-5P | 5.198109853 | HSA-MIR-20A*       | 3.411260488 |                |              | HSA-MIR-221         | -3.355406179 |
| 36 | HSA-MIR-412     | 4.92477652  | HSA-MIR-498        | 3.382927154 |                |              | HSA-MIR-10B         | -3.118739512 |
| 37 | HSA-MIR-3685    | 4.878109853 | HSA-MIR-1281       | 3.329593821 |                |              | HSA-MIR-222         | -2.923739512 |

|    |                 |             |                      |             |  |  |                     |              |
|----|-----------------|-------------|----------------------|-------------|--|--|---------------------|--------------|
| 38 | HSA-MIR-433     | 4.788109853 | HSA-MIR-92A          | 3.286260488 |  |  | HSA-MIR-29A*        | -2.775406179 |
| 39 | HSA-MIR-192     | 4.611443186 | HSA-MIR-19A          | 3.224593821 |  |  | HSA-MIR-146B<br>-5P | -2.755406179 |
| 40 | HSA-MIR-524-3P  | 4.538109853 | HSA-MIR-651          | 3.117927154 |  |  | HSA-MIR-4288        | -2.755406179 |
| 41 | HSA-MIR-515-3P  | 4.418109853 | HSA-MIR-518B         | 3.102927154 |  |  | HSA-MIR-365         | -2.648739512 |
| 42 | HSA-MIR-522     | 4.39477652  | HSA-MIR-296<br>-5P   | 3.081260488 |  |  | HSA-MIR-21*         | -2.475406179 |
| 43 | HSA-MIR-105     | 4.371443186 | HSA-MIR-572          | 3.039593821 |  |  | HSA-MIR-145*        | -2.448739512 |
| 44 | HSA-MIR-3150B   | 4.301443186 | HSA-MIR-92B          | 2.919593821 |  |  | HSA-MIR-708         | -2.393739512 |
| 45 | HSA-MIR-612     | 4.27477652  | HSA-MIR-338<br>-3P   | 2.912927154 |  |  | HSA-MIR-181B        | -2.300406179 |
| 46 | HSA-MIR-520D-5P | 4.268109853 | HSA-MIR-548F         | 2.864593821 |  |  | HSA-MIR-34A*        | -2.267072846 |
| 47 | HSA-MIR-648     | 4.24477652  | HSA-MIR-126*         | 2.861260488 |  |  | HSA-MIR-15A         | -2.163739512 |
| 48 | HSA-MIR-524-5P  | 4.14477652  | HSA-MIR-340          | 2.831260488 |  |  | HSA-MIR-30A*        | -2.105406179 |
| 49 | HSA-MIR-518D-3P | 3.948109853 | HSA-MIR-219-1<br>-3P | 2.806260488 |  |  | HSA-MIR-181D        | -1.990406179 |
| 50 | HSA-MIR-516A-5P | 3.918109853 | HSA-MIR-877          | 2.792927154 |  |  | HSA-MIR-30A         | -1.913739512 |
| 51 | HSA-MIR-744*    | 3.728109853 | HSA-MIR-20B*         | 2.774593821 |  |  | HSA-MIR-450A        | -1.893739512 |
| 52 | HSA-MIR-9*      | 3.721443186 | HSA-MIR-106B         | 2.771260488 |  |  | HSA-MIR-411         | -1.862072846 |
| 53 | HSA-MIR-575     | 3.691443186 | HSA-MIR-1274A        | 2.766260488 |  |  | HSA-MIR-27B         | -1.852072846 |
| 54 | HSA-MIR-200B*   | 3.678109853 | HSA-MIR-130A         | 2.721260488 |  |  | HSA-MIR-497         | -1.847072846 |
| 55 | HSA-MIR-519E*   | 3.65477652  | HSA-MIR-940          | 2.721260488 |  |  | HSA-MIR-34C<br>-5P  | -1.803739512 |

|    |                |             |                      |             |  |  |                |              |
|----|----------------|-------------|----------------------|-------------|--|--|----------------|--------------|
| 56 | HSA-MIR-516B   | 3.578109853 | HSA-MIR-602          | 2.626260488 |  |  | HSA-MIR-26B    | -1.788739512 |
| 57 | HSA-MIR-92A-2* | 3.558109853 | HSA-MIR-512-3P       | 2.574593821 |  |  | HSA-MIR-193B   | -1.782072846 |
| 58 | HSA-MIR-1283   | 3.391443186 | HSA-MIR-92A-1*       | 2.567927154 |  |  | HSA-MIR-4301   | -1.763739512 |
| 59 | HSA-MIR-519E   | 3.381443186 | HSA-MIR-346          | 2.557927154 |  |  | HSA-MIR-4328   | -1.707072846 |
| 60 | HSA-MIR-373*   | 2.83477652  | HSA-MIR-3621         | 2.542927154 |  |  | HSA-MIR-4291   | -1.697072846 |
| 61 | HSA-MIR-466    | 2.79477652  | HSA-MIR-2277<br>-3P  | 2.531260488 |  |  | HSA-MIR-625    | -1.673739512 |
| 62 | HSA-MIR-589    | 2.74477652  | HSA-MIR-210          | 2.504593821 |  |  | HSA-MIR-299-5P | -1.670406179 |
| 63 | HSA-MIR-141*   | 2.44477652  | HSA-MIR-3618         | 2.496260488 |  |  | HSA-MIR-195    | -1.647072846 |
| 64 | HSA-MIR-1273C  | 1.938109853 | HSA-MIR-874          | 2.491260488 |  |  | HSA-MIR-24-2*  | -1.627072846 |
| 65 | HSA-MIR-876-3P | 1.84477652  | HSA-MIR-142<br>-3P   | 2.439593821 |  |  | HSA-MIR-362-3P | -1.540406179 |
| 66 | HSA-MIR-196B*  | 1.83477652  | HSA-MIR-483<br>-5P   | 2.396260488 |  |  | HSA-MIR-99B    | -1.523739512 |
| 67 |                |             | HSA-MIR-1468         | 2.379593821 |  |  | HSA-MIR-3158   | -1.500406179 |
| 68 |                |             | HSA-MIR-503          | 2.297927154 |  |  |                |              |
| 69 |                |             | HSA-MIR-1247         | 2.262927154 |  |  |                |              |
| 70 |                |             | HSA-MIR-3181         | 2.221260488 |  |  |                |              |
| 71 |                |             | HSA-MIR-1233         | 2.217927154 |  |  |                |              |
| 72 |                |             | HSA-MIR-3622A-<br>5P | 2.194593821 |  |  |                |              |
| 73 |                |             | HSA-MIR-942          | 2.167927154 |  |  |                |              |
| 74 |                |             | HSA-MIR-4314         | 2.097927154 |  |  |                |              |

|    |  |  |                     |             |  |  |  |  |
|----|--|--|---------------------|-------------|--|--|--|--|
| 75 |  |  | HSA-MIR-518E*       | 2.089593821 |  |  |  |  |
| 76 |  |  | HSA-MIR-519B<br>-3P | 2.086260488 |  |  |  |  |
| 77 |  |  | HSA-MIR-1244        | 2.057927154 |  |  |  |  |
| 78 |  |  | HSA-MIR-93          | 2.022927154 |  |  |  |  |
| 79 |  |  | HSA-MIR-339<br>-5P  | 2.011260488 |  |  |  |  |
| 80 |  |  | HSA-MIR-25*         | 1.999593821 |  |  |  |  |
| 81 |  |  | HSA-MIR-675         | 1.987927154 |  |  |  |  |
| 82 |  |  | HSA-MIR-153         | 1.934593821 |  |  |  |  |
| 83 |  |  | HSA-MIR-545*        | 1.911260488 |  |  |  |  |
| 84 |  |  | HSA-MIR-3656        | 1.901260488 |  |  |  |  |
| 85 |  |  | HSA-MIR-718         | 1.879593821 |  |  |  |  |
| 86 |  |  | HSA-MIR-18B*        | 1.876260488 |  |  |  |  |
| 87 |  |  | HSA-MIR-216A        | 1.874593821 |  |  |  |  |
| 88 |  |  | HSA-MIR-1224<br>-3P | 1.871260488 |  |  |  |  |
| 89 |  |  | HSA-MIR-374B        | 1.869593821 |  |  |  |  |
| 90 |  |  | HSA-MIR-25          | 1.854593821 |  |  |  |  |
| 91 |  |  | HSA-MIR-130B        | 1.847927154 |  |  |  |  |
| 92 |  |  | HSA-MIR-92B*        | 1.834593821 |  |  |  |  |
| 93 |  |  | HSA-MIR-1237        | 1.819593821 |  |  |  |  |
| 94 |  |  | HSA-MIR-526A        | 1.811260488 |  |  |  |  |

|                    |  |           |               |             |  |           |           |
|--------------------|--|-----------|---------------|-------------|--|-----------|-----------|
| 95                 |  |           | HSA-MIR-4321  | 1.726260488 |  |           |           |
| 96                 |  |           | HSA-MIR-937   | 1.719593821 |  |           |           |
| 97                 |  |           | HSA-MIR-7     | 1.692927154 |  |           |           |
| 98                 |  |           | HSA-MIR-4279  | 1.674593821 |  |           |           |
| 99                 |  |           | HSA-MIR-378   | 1.667927154 |  |           |           |
| 100                |  |           | HSA-MIR-154*  | 1.661260488 |  |           |           |
| 101                |  |           | HSA-MIR-3615  | 1.654593821 |  |           |           |
| 102                |  |           | HSA-MIR-3137  | 1.636260488 |  |           |           |
| 103                |  |           | HSA-MIR-148A  | 1.619593821 |  |           |           |
| 104                |  |           | HSA-MIR-301B  | 1.611260488 |  |           |           |
| 105                |  |           | HSA-MIR-431*  | 1.604593821 |  |           |           |
| 106                |  |           | HSA-MIR-1270  | 1.601260488 |  |           |           |
| 107                |  |           | HSA-MIR-29C*  | 1.571260488 |  |           |           |
| 108                |  |           | HSA-MIR-130A* | 1.539593821 |  |           |           |
| 109                |  |           | HSA-MIR-4318  | 1.537927154 |  |           |           |
| 110                |  |           | HSA-MIR-4263  | 1.534593821 |  |           |           |
| 111                |  |           | HSA-MIR-1307  | 1.527927154 |  |           |           |
|                    |  | <b>66</b> |               | <b>111</b>  |  | <b>17</b> | <b>67</b> |
| <b>Total = 261</b> |  |           |               |             |  |           |           |



Supplementary Table3. Mir families and expression levels in pair-comparison for iPSC vs MSC (n=82)

**I. Up-regulated in iPSC (both -5p and -3p species Log<sub>2</sub>(FC) >1.5) (n=14 pairs, 28 miRNAs)**

| No | miRNA family | Chromos' l site | miRNA-5p     | Other name(s) | Expression status | Log <sub>2</sub> (FC) | miRNA-3p    | Other name(s) | Expression status | Log <sub>2</sub> (FC) |
|----|--------------|-----------------|--------------|---------------|-------------------|-----------------------|-------------|---------------|-------------------|-----------------------|
| 1  | mir-17       | 13q31.3         | miR-18a-5p   | miR-18A       | Up                | 5.823                 | miR-18a-3p  | miR-18A*      | Up                | 4.133                 |
| 2  |              | 13q31.3         | miR-20a-5p   | miR-20A       | Up                | 4.226                 | miR-20a-3p  | miR-20*       | Up                | 4.096                 |
| 3  |              | Xq26.2          | miR-20b-5p   | miR-20b       | Up                | 5.171                 | miR-20b-3p  | miR-20B*      | Up                | 3.023                 |
| 4  |              | Xq26.2          | miR-106a-5p  | miR-106A      | Up                | 4.640                 | miR-106a-3p | miR-106A*     | Up                | 2.739                 |
| 5  | mir-8        | 12p13.31        | miR-141-5p   | miR-141*      | Act               | 2.110                 | miR-141-3p  | miR-141       | Up                | 6.446                 |
| 6  | mir-25       | 1q22            | miR-92b-5p   | miR-92B*      | Up                | 1.835                 | miR-92b-3p  | miR-92B       | Up                | 2.920                 |
| 7  |              | 7q22.1          | miR-25-5p    | miR-25*       | Up                | 2.000                 | miR-25-3p   | miR-25        | Up                | 1.983                 |
| 8  |              | 13q31.3         | miR-92a-1-5p | miR-92A-1*    | Up                | 2.568                 | miR-92a-3p  | miR-92A       | Up                | 2.923                 |
| 9  | mir-126      | 9q34.3          | miR-126-5p   | miR-126*      | Up                | 2.133                 | miR-126-3p  | miR-126       | Up                | 3.186                 |
| 10 | mir-130      | 11q12.1         | miR-130a-5p  | miR-130A*     | Up                | 1.610                 | miR-130a-3p | miR-130a      | Up                | 3.770                 |
| 11 | mir-135      | 3p21.2          | miR-135a-5p  | miR-135A      | Up                | 8.933                 | miR-135a-3p | miR-135A*     | Act               | 5.265                 |
| 12 | mir-335      | 7q32.2          | miR-335-5p   | miR-335       | Up                | 4.416                 | miR-335-3p  | miR-335*      | Up                | 5.066                 |
| 13 | mir-340      | 5q35.3          | miR-340-5p   | miR-340       | Up                | 3.283                 | miR-340-3p  | miR-340*      | Up                | 1.922                 |
| 14 | mir-515      | 19q13.42        | miR-518f-5p  | miR-518F*     | Up                | 3.556                 | miR-518-3p  | miR-518F      | Up                | 7.178                 |

**II. Down-regulated in iPSC (both -5p and -3p species Log<sub>2</sub>(FC)<-1.5) (n=10 pairs, 20 miRNAs)**

| No | miRNA family | Chromos' l site | miRNA-5p     | Other name(s) | Expression Status | Log <sub>2</sub> (FC) | miRNA-3p     | Other name(s) | Expression Status | Log <sub>2</sub> (FC) |
|----|--------------|-----------------|--------------|---------------|-------------------|-----------------------|--------------|---------------|-------------------|-----------------------|
| 1  | mir-29       | 7q32.3          | miR-29a-5p   | miR-29A*      | Down              | -1.807                | miR-29a-3p   | miR-29A       | Down              | -6.487                |
| 2  |              | 7q32.3          | miR-29b-1-5p | miR-29B-1*    | Down              | -5.000                | miR-29b-3p   | miR-29B       | Down              | -4.553                |
| 3  | mir-31       | 9p21.3          | miR-31-5p    | miR-31        | Down              | -4.737                | miR-31-3p    | miR-31*       | Down              | -4.447                |
| 4  | mir-145      | 5q32            | miR-145-5p   | miR-145       | Down              | -4.8407               | miR-145-3p   | miR-145*      | Down              | -2.0969               |
| 5  | mir-193      | 17q11.2         | miR-193a-5p  |               | Down              | -4.6307               | miR-193a-3p  | miR-193A      | Down              | -2.026                |
| 6  | mir-199      | 19p13.2         | miR-199a-5p  | miR-199A      | Down              | -7.677                | miR-199a-3P  | miR-199a*     | Down              | -8.274                |
| 7  | mir-214      | 1q24.3          | miR-214-5p   | miR-214*      | Down              | -2.869                | miR-214-3p   | miR-214       | Down              | -3.834                |
| 8  | mir-218      | 5q34            | miR-218-5p   | miR-218       | Down              | -3.257                | miR-218-2-3p | miR-218-2*    | Shut              | -1.540                |
| 19 | mir-221      | Xp11.3          | miR-221-5p   | miR-221*      | Down              | -3.277                | miR-221-3p   | miR-221       | Down              | -3.080                |
| 10 | mir-322      | Xq26.3          | miR-424-5p   | miR-424       | Down              | -3.657                | miR-424-3p   | miR-424*      | Down              | -3.934                |

**III. Activated in iPSC (both 5p/3p Log<sub>2</sub>(FC)>1.5) (n=12 pairs, 24 miRNA)**

| No | miRNA family | Chromos' l site | miRNA-5p    | Other name(s) | Expression status | Log <sub>2</sub> (FC) | miRNA-3p    | Other name(s) | Expression status | Log <sub>2</sub> (FC) |
|----|--------------|-----------------|-------------|---------------|-------------------|-----------------------|-------------|---------------|-------------------|-----------------------|
| 1  | mir-8        | 12p13.31        | miR-200c-5p | miR-200C*     | Up                | 1.583                 | miR-200c-3p | miR-200C      | Act               | 10.366                |
| 2  | mir-17       | Xq26.2          | miR-18b-5p  | miR-18B       | Act               | 7.376                 | miR-18b-3p  | miR-18B*      | Up                | 2.453                 |
| 3  | mir-373      | 19q13.42        | miR-373-5p  | miR-373*      | Act               | 2.500                 | miR-373-3p  | miR-373       | Act               | 7.240                 |
| 4  | mir-515      | 19q13.42        | miR-515-5p  |               | Act               | 7.053                 | miR-515-3p  |               | Act               | 4.083                 |
| 5  | mir-290      | 19q13.42        | miR-371a-5p | miR-371-5P    | Act               | 6.256                 | miR-371a-3p | miR-371-3P    | Up                | 4.024                 |
| 6  | mir-296      | 20q13.32        | miR-296-5p  | miR-296       | Up                | 3.083                 | miR-296-3p  |               | Act               | 7.560                 |
| 7  | mir-515      | 19q13.42        | miR-519e-5p | miR-519E*     | Act               | 3.320                 | miR-519e-3p | miR-519E      | Act               | 3.046                 |
| 8  | mir-339      | 7p22.3          | miR-339-5p  | miR-339       | Up                | 2.690                 | miR-339-3p  |               | Act               | 5.490                 |
| 9  | mir-589      | 7p22.1          | miR-589-5p  | miR-589       | Act               | 2.410                 | miR-589-3p  | miR-589*      | Up                | 1.734                 |
| 10 | mir-3180     |                 | miR-3180-5p |               | Up                | 2.189                 | miR-3180-3p |               | Act               | 6.780                 |
| 11 | mir-148      | 7p15.2          | miR-148a-5p | miR-148A*     | Act               | 4.625                 | miR-148a-3p | miR-148A      | Up                | 1.650                 |
| 12 | mir-744      | 7p12            | miR-744-5p  | miR-744       | Up                | 1.536                 | miR-744-3p  | miR-744*      | Act               | 3.393                 |

**IV. Shutdown in iPSC (both <1.5) (n=4 pairs, 8 miRNAs)**

| No | miRNA family | Chromos' l site | miRNA-5p    | Other name(s) | Expression status | Log2(FC) | miRNA-3p   | Other name(s) | Expression status | Log2(FC) |
|----|--------------|-----------------|-------------|---------------|-------------------|----------|------------|---------------|-------------------|----------|
| 1  | mir-10       | 7q21.32         | miR-10a-5p  | miR-10A       | Shut              | -12.420  | miR-10a-3p | miR-10A*      | Shut              | -2.790   |
| 2  | let-7        | 9q22.32         | let-7d-5p   | let-7D        | Shut              | -9.120   | let-7d-3p  | let-7D*       | Shut              | -6.090   |
| 3  | mir-22       | 17p13.3         | miR-22-5p   | miR-22*       | Shut              | -7.880   | miR-22-3p  | miR-22        | Down              | -4.527   |
| 4  | mir-24       | 9q22.32         | miR-24-1-5p | miR-24-1*     | Shut              | -1.927   | miR-24-3p  | miR-24        | Down              | -3.167   |

**V. Reverse direction in iPSC (both -5p and -3p species Log2(FC)<-1.5) (n=4 pairs, 8 miRNAs)**

| No       | miRNA family   | Chromos' l site | miRNA-5p          | Other name(s)  | Expression Status | Log2(FC)      | miRNA-3p           | Other name(s)    | Expression Status | Log2(FC)     |
|----------|----------------|-----------------|-------------------|----------------|-------------------|---------------|--------------------|------------------|-------------------|--------------|
| 1        | mir-146        | 10q24.32        | miR-146b-5p       | miR-146B       | Down              | -4.367        | <b>miR-146b-3p</b> |                  | <b>Up</b>         | <b>1.500</b> |
| 2        | mir-196        | 7p15.2          | miR-196b-5p       | miR-196B       | Down              | -5.587        | <b>miR-196b-3p</b> | <b>miR-196B*</b> | <b>Act</b>        | <b>1.500</b> |
| <b>3</b> | <b>mir-139</b> | <b>11q13.4</b>  | <b>miR-139-5p</b> | <b>miR-139</b> | <b>Shut</b>       | <b>-9.810</b> | <b>miR-139-3p</b>  |                  | <b>Up</b>         | <b>1.943</b> |
| <b>4</b> | <b>mir-876</b> | <b>9p21.1</b>   | <b>miR-876-5p</b> |                | <b>Shut</b>       | <b>-3.797</b> | <b>miR-876-3p</b>  |                  | <b>Act</b>        | <b>1.510</b> |

**Supplementary Table 4: Predicted targets of differentially expressed miR-5p and-3p pairs in iPSCs relative to MSCs**

| miRNA family                                      | Chromosomal site | miRNA <sup>1</sup> | -5p/-3p name | Log <sub>2</sub> (Fold change) (mean±SD) | Affected processes: Selected target mRNAs <sup>2</sup>                                                                                                                                                                                                                                                                                                                                                                                                                                                                                                                                                                                                                                                                                                                                                                                                                                                                                                                                                                                                                                                                                                                                                                                                                                                                        |
|---------------------------------------------------|------------------|--------------------|--------------|------------------------------------------|-------------------------------------------------------------------------------------------------------------------------------------------------------------------------------------------------------------------------------------------------------------------------------------------------------------------------------------------------------------------------------------------------------------------------------------------------------------------------------------------------------------------------------------------------------------------------------------------------------------------------------------------------------------------------------------------------------------------------------------------------------------------------------------------------------------------------------------------------------------------------------------------------------------------------------------------------------------------------------------------------------------------------------------------------------------------------------------------------------------------------------------------------------------------------------------------------------------------------------------------------------------------------------------------------------------------------------|
| <b>(I) Co-upregulated/-activated pairs (n=26)</b> |                  |                    |              |                                          |                                                                                                                                                                                                                                                                                                                                                                                                                                                                                                                                                                                                                                                                                                                                                                                                                                                                                                                                                                                                                                                                                                                                                                                                                                                                                                                               |
| mir-8                                             | 12p13.31         | hsa-miR-141*       | miR-141-5p   | 2.110                                    | <p><b>Cell cycle:</b> FZR1, CCND1, SMC1A, TGFB1, CCND2, CDC25C, CDKN1B, TP53, MYC</p> <p><b>p53 signaling pathway:</b> PTEN, CCND1, CCND2, TP53</p> <p><b>PI3K-Akt signaling pathway:</b> PTEN, VEGFA, MYB, MET, CCND1, EIF4E, CCND2, PIK3CA, LAMC2, CDKN1B, CREB1, MYC</p> <p><b>Wnt signaling pathway:</b> FBXW11, SFRP1, JUN, CCND1, CCND2, CSNK1A1, TP53, MYC</p> <p><b>Adhesion:</b> PTEN, ACTG1, SNAI2, VEGFA, JUN, MET, CCND1, CDH1, CCND2, PIK3CA, LAMC2</p> <p><b>HIF-1 signaling pathway:</b> VEGFA, EIF4E, PIK3CA, CDKN1B</p> <p><b>Apoptosis:</b> PIK3CA, TP53</p> <p><b>ErbB signaling pathway:</b> JUN, MAP2K4, PIK3CA, ERBB4, CDKN1B, MYC</p> <p><b>GnRH signaling pathway:</b> MAPK14, JUN, MAP2K4</p> <p><b>Chemokine signaling pathway:</b> PIK3CA</p> <p><b>Cytokine-cytokine receptor interaction:</b> MET, TGFB1, INHBC, BMP2</p> <p><b>TGF-beta signaling pathway:</b> TGFB1, INHBC, BMP2, MYC</p> <p><b>MAPK signaling pathway:</b> MAPK14, JUN, MAP2K4, TGFB1, TP53, MYC</p> <p><b>Osteoclast differentiation:</b> MAPK14, JUN, TGFB1, PIK3CA, CREB1</p> <p><b>Oocyte meiosis:</b> FBXW11, SMC1A, CDC25C</p> <p><b>mTOR signaling pathway:</b> PTEN, VEGFA, EIF4E, PIK3CA</p> <p><b>Metabolic pathways:</b> HPRT1, PSAT1, RPIA, AMACR</p> <p><b>VEGF signaling pathway:</b> MAPK14, VEGFA, PIK3CA</p> |
| mir-8                                             | 12p13.31         | hsa-miR-141        | miR-141-3p   | 6.446                                    | <p><b>Cell cycle:</b> E2F3, TGFB2</p> <p><b>p53 signaling pathway:</b> PTEN</p> <p><b>PI3K-Akt signaling pathway:</b> EIF4E</p> <p><b>Wnt signaling pathway:</b> TCF7L1, CTBP2</p> <p><b>Adhesion:</b> PTEN, SHC1, TCF7L1</p> <p><b>HIF-1 signaling pathway:</b> EIF4E</p>                                                                                                                                                                                                                                                                                                                                                                                                                                                                                                                                                                                                                                                                                                                                                                                                                                                                                                                                                                                                                                                    |

|         |        |              |            |       |                                                                                                                                                                                                                                                                                                                                                                                                                                                                                                                                                                                                                                                                                                                                                                                                                                                                                                                                                                                                                                                                                                                                                                                                                                                                                                                                                                                                                                                                                                                                                                         |
|---------|--------|--------------|------------|-------|-------------------------------------------------------------------------------------------------------------------------------------------------------------------------------------------------------------------------------------------------------------------------------------------------------------------------------------------------------------------------------------------------------------------------------------------------------------------------------------------------------------------------------------------------------------------------------------------------------------------------------------------------------------------------------------------------------------------------------------------------------------------------------------------------------------------------------------------------------------------------------------------------------------------------------------------------------------------------------------------------------------------------------------------------------------------------------------------------------------------------------------------------------------------------------------------------------------------------------------------------------------------------------------------------------------------------------------------------------------------------------------------------------------------------------------------------------------------------------------------------------------------------------------------------------------------------|
|         |        |              |            |       | <p><b>ErbB signaling pathway:</b> SHC1</p> <p><b>GnRH signaling pathway:</b> MAPK14</p> <p><b>Chemokine signaling pathway:</b> SHC1</p> <p><b>Cytokine-cytokine receptor interaction:</b> TGFB2, ACVR2B</p> <p><b>TGF-beta signaling pathway:</b> TGFB2, ACVR2B</p> <p><b>MAPK signaling pathway:</b> STK3, TGFB2, MAPK14</p> <p><b>Osteoclast differentiation:</b> TGFB2, MAPK14</p> <p><b>mTOR signaling pathway:</b> EIF4E</p> <p><b>VEGF signaling pathway:</b> MAPK14</p>                                                                                                                                                                                                                                                                                                                                                                                                                                                                                                                                                                                                                                                                                                                                                                                                                                                                                                                                                                                                                                                                                          |
| mir-126 | 9q34.3 | hsa-miR-126* | miR-126-5p | 2.133 | <p><b>Cell cycle:</b> TP53, CCND1, CDKN1A, MCM2, CCNE2</p> <p><b>p53 signaling pathway:</b> TP53, CCND1, PTEN, BAX, CDKN1A, CCNE2, CASP3</p> <p><b>PI3K-Akt signaling pathway:</b> MYB, AKT1, VEGFA, PIK3CA, CREB1, MET, TP53, CCND1, KRAS, EGF, PIK3R2, KDR, NRAS, JAK2, IRS1, PTEN, PDGFB, TLR2, TLR4, CDKN1A, CCNE2, TNC</p> <p><b>Wnt signaling pathway:</b> JUN, TP53, CCND1, MAPK8</p> <p><b>Adhesion:</b> AKT1, VEGFA, JUN, MET, CCND1, EGF, PIK3R2, KDR, CRK, EGFR, PTEN, PDGFB, MAPK8, PAK1, SRC, TNC</p> <p><b>NF- kappa B signaling pathway:</b> VCAM1, IL1B, TLR4, CXCL12</p> <p><b>HIF-1 signaling pathway:</b> AKT1, VEGFA, PIK3CA, EGF, PIK3R2, EGFR, TLR4, CDKN1A</p> <p><b>Apoptosis:</b> AKT1, PIK3CA, TP53, PIK3R2, IL1B, BAX, CASP3</p> <p><b>ErbB signaling pathway:</b> AKT1, PIK3CA, JUN, KRAS, EGF, PIK3R2, CRK, NRAS, EGFR, MAPK8, CDKN1A, PAK1, SRC, STAT5A</p> <p><b>GnRH signaling pathway:</b> JUN, KRAS, NRAS, EGFR, MAPK8, SRC</p> <p><b>Chemokine signaling pathway:</b> AKT1, PIK3CA, CXCR4, KRAS, PIK3R2, CRK, NRAS, JAK2, PAK1, SRC, CXCL12</p> <p><b>Adipocytokine signaling pathway:</b> JAK2, IRS1, MAPK8</p> <p><b>Cytokine-cytokine receptor interaction:</b> VEGFA, MET, CXCR4, EGF, KDR, FLT3, EGFR, CD70, TGFB2, PDGFB, IL1B, ACVR2A, CXCL12</p> <p><b>TGF-beta signaling pathway:</b> TGFB2, ACVR2A</p> <p><b>MAPK signaling pathway:</b> PTPN7, AKT1, JUN, TP53, KRAS, EGF, CRK, NRAS, STMN1, EGFR, TGFB2, PDGFB, IL1B, MAPK8, PAK1, CASP3</p> <p><b>Osteoclast differentiation:</b> AKT1, PIK3CA, JUN, CREB1, PIK3R2,</p> |

|         |         |               |             |       |                                                                                                                                                                                                                                                                                                                                                                                                                                                                                                                                                                                                                                                                                                                                                                                                                                                                                                                             |
|---------|---------|---------------|-------------|-------|-----------------------------------------------------------------------------------------------------------------------------------------------------------------------------------------------------------------------------------------------------------------------------------------------------------------------------------------------------------------------------------------------------------------------------------------------------------------------------------------------------------------------------------------------------------------------------------------------------------------------------------------------------------------------------------------------------------------------------------------------------------------------------------------------------------------------------------------------------------------------------------------------------------------------------|
|         |         |               |             |       | <p>TGFBR2, IL1B, MAPK8</p> <p><b>Oocyte meiosis:</b> CCNE2</p> <p><b>mTOR signaling pathway:</b> AKT1, VEGFA, PIK3CA, PIK3R2, IRS1, PTEN</p> <p><b>Metabolic pathways:</b> COX8A, CYP2A6, POLR2A</p> <p><b>VEGF signaling pathway:</b> AKT1, VEGFA, PIK3CA, KRAS, PIK3R2, KDR, NRAS, SRC</p>                                                                                                                                                                                                                                                                                                                                                                                                                                                                                                                                                                                                                                |
| mir-126 | 9q34.3  | hsa-miR-126   | miR-126-3p  | 3.186 | <p><b>Cell cycle:</b> E2F1, CCNE2, E2F1</p> <p><b>p53 signaling pathway:</b> CCNE2</p> <p><b>PI3K-Akt signaling pathway:</b> IRS1, VEGFA, KRAS</p> <p><b>Adhesion:</b> PIK3R2, CRK, VEGFA</p> <p><b>NF- kappa B signaling pathway:</b> VCAM1</p> <p><b>HIF-1 signaling pathway:</b> VEGFA</p> <p><b>Apoptosis:</b> PIK3R2</p> <p><b>ErbB signaling pathway:</b> PIK3R2, CRK, KRAS</p> <p><b>GnRH signaling pathway:</b> KRAS</p> <p><b>Chemokine signaling pathway:</b> PIK3R2, CRK, KRAS</p> <p><b>Adipocytokine signaling pathway:</b> IRS1, IRS1</p> <p><b>Cytokine-cytokine receptor interaction:</b> VEGFA</p> <p><b>MAPK signaling pathway:</b> CRK, PTPN7, KRAS</p> <p><b>Osteoclast differentiation:</b> PIK3R2</p> <p><b>Oocyte meiosis:</b> CCNE2</p> <p><b>mTOR signaling pathway:</b> PIK3R2, IRS1, VEGFA</p> <p><b>Metabolic pathways:</b> DNMT1</p> <p><b>VEGF signaling pathway:</b> PIK3R2, VEGFA, KRAS</p> |
| mir-130 | 11q12.1 | hsa-miR-130a* | miR-130a-5p | 1.610 | <p><b>Cell cycle:</b> TP53, TGFB1</p> <p><b>p53 signaling pathway:</b> PTEN, TP53</p> <p><b>PI3K-Akt signaling pathway:</b> PTEN, TP53, ITGA2B, PIK3CA, CSF1, IKBKB, RELA, KIT, MTOR</p> <p><b>Wnt signaling pathway:</b> TP53</p> <p><b>Adhesion:</b> PTEN, ITGA2B, PIK3CA</p> <p><b>NF- kappa B signaling pathway:</b> CXCL12, IL1B, IRAK1, IKBKB, RELA</p> <p><b>HIF-1 signaling pathway:</b> PIK3CA, RELA, MTOR</p> <p><b>Apoptosis:</b> TP53, PIK3CA, IL1B, IRAK1, IKBKB, IL1A, RELA</p> <p><b>ErbB signaling pathway:</b> PIK3CA, MTOR</p>                                                                                                                                                                                                                                                                                                                                                                            |

|         |         |               |             |       |                                                                                                                                                                                                                                                                                                                                                                                                                                                                                                                                                                                                                                                                                                                                                                         |
|---------|---------|---------------|-------------|-------|-------------------------------------------------------------------------------------------------------------------------------------------------------------------------------------------------------------------------------------------------------------------------------------------------------------------------------------------------------------------------------------------------------------------------------------------------------------------------------------------------------------------------------------------------------------------------------------------------------------------------------------------------------------------------------------------------------------------------------------------------------------------------|
|         |         |               |             |       | <b>Chemokine signaling pathway:</b> CXCL12, PIK3CA, IKBKB, RELA<br><b>Adipocytokine signaling pathway:</b> RELA, POMC, MTOR<br><b>Cytokine-cytokine receptor interaction:</b> CXCL12, TGFB1, IL1B, CSF1, IL1A, KIT<br><b>TGF-beta signaling pathway:</b> TGFB1<br><b>MAPK signaling pathway:</b> TP53, TGFB1, IL1B, BDNF, IKBKB, IL1A, RELA, FOS<br><b>Osteoclast differentiation:</b> TGFB1, PIK3CA, IL1B, CSF1, IKBKB, IL1A, RELA, FOS<br><b>mTOR signaling pathway:</b> PTEN, PIK3CA, IKBKB, MTOR<br><b>Metabolic pathways:</b> COX8A, ME1, G6PD<br><b>VEGF signaling pathway:</b> PIK3CA<br><b>PPAR signaling pathway:</b> ME1                                                                                                                                      |
| mir-130 | 11q12.1 | hsa-miR-130a  | miR-130a-3p | 3.770 | <b>PI3K-Akt signaling pathway:</b> CSF1<br><b>Cytokine-cytokine receptor interaction:</b> CSF1<br><b>Osteoclast differentiation:</b> CSF1, PPARG<br><b>PPAR signaling pathway:</b> PPARG                                                                                                                                                                                                                                                                                                                                                                                                                                                                                                                                                                                |
| mir-135 | 3p21.2  | hsa-miR-135a  | miR-135a-5p | 8.933 | <b>Cell cycle:</b> TGFB1<br><b>PI3K-Akt signaling pathway:</b> ITGA2B, COL1A1, BCL2L1<br><b>Wnt signaling pathway:</b> APC<br><b>Adhesion:</b> ITGA2B, COL1A1<br><b>NF- kappa B signaling pathway:</b> BCL2L1<br><b>HIF-1 signaling pathway:</b> STAT3, HIF1A<br><b>Apoptosis:</b> BCL2L1<br><b>Chemokine signaling pathway:</b> JAK2, STAT3<br><b>Adipocytokine signaling pathway:</b> JAK2, STAT3<br><b>Cytokine-cytokine receptor interaction:</b> TGFB1, BMP2<br><b>TGF-beta signaling pathway:</b> TGFB1, BMP2, SMAD5<br><b>MAPK signaling pathway:</b> FOS, TGFB1<br><b>Osteoclast differentiation:</b> FOS, TGFB1<br><b>mTOR signaling pathway:</b> HIF1A<br><b>Metabolic pathways:</b> ME1, ALOX5, IMPDH1, RDH10<br><b>PPAR signaling pathway:</b> ME1, SLC27A4 |
| mir-135 | 3p21.2  | hsa-miR-135a* | miR-135a-3p | 5.265 | <b>PI3K-Akt signaling pathway:</b> BCL2L1, JAK2, ITGA2B                                                                                                                                                                                                                                                                                                                                                                                                                                                                                                                                                                                                                                                                                                                 |



|         |        |               |             |       |                                                                                                                                                                                                                                                                                                                                                                                                                                                                                                                                                                                                                                                                                                                                                                                                                                                                                                                                                                                                                        |
|---------|--------|---------------|-------------|-------|------------------------------------------------------------------------------------------------------------------------------------------------------------------------------------------------------------------------------------------------------------------------------------------------------------------------------------------------------------------------------------------------------------------------------------------------------------------------------------------------------------------------------------------------------------------------------------------------------------------------------------------------------------------------------------------------------------------------------------------------------------------------------------------------------------------------------------------------------------------------------------------------------------------------------------------------------------------------------------------------------------------------|
|         |        |               |             |       | <p><b>Wnt signaling pathway:</b> APC</p> <p><b>Adhesion:</b> ITGA2B</p> <p><b>NF- kappa B signaling pathway:</b> BCL2L1</p> <p><b>Apoptosis:</b> BCL2L1</p> <p><b>Chemokine signaling pathway:</b> JAK2</p> <p><b>Adipocytokine signaling pathway:</b> JAK2</p> <p><b>Cytokine-cytokine receptor interaction:</b> BMP2</p> <p><b>TGF-beta signaling pathway:</b> SMAD5, BMP2</p> <p><b>Metabolic pathways:</b> ME1</p> <p><b>PPAR signaling pathway:</b> ME1</p>                                                                                                                                                                                                                                                                                                                                                                                                                                                                                                                                                       |
| mir-148 | 7p15.2 | hsa-miR-148a* | miR-148a-5p | 4.625 | <p><b>Cell cycle:</b> TP53, MYC, RBL2, CDK6, CDKN2A, E2F3</p> <p><b>p53 signaling pathway:</b> TP53, CDK6, CDKN2A</p> <p><b>PI3K-Akt signaling pathway:</b> TP53, TLR4, KIT, MYC, VEGFA, RBL2, CDK6, KITLG, IL6, IFNA1</p> <p><b>Wnt signaling pathway:</b> TP53, APC, MYC, CTNNB1</p> <p><b>Adhesion:</b> VEGFA, CTNNB1</p> <p><b>NF- kappa B signaling pathway:</b> TLR4, ZAP70</p> <p><b>HIF-1 signaling pathway:</b> TLR4, VEGFA, IL6</p> <p><b>Apoptosis:</b> TP53</p> <p><b>ErbB signaling pathway:</b> MYC</p> <p><b>Adipocytokine signaling pathway:</b> POMC</p> <p><b>Cytokine-cytokine receptor interaction:</b> FLT3, KIT, CD70, TGFBR2, VEGFA, KITLG, IL6, IFNA1</p> <p><b>TGF-beta signaling pathway:</b> MYC, TGFBR2</p> <p><b>MAPK signaling pathway:</b> TP53, MYC, TGFBR2, BDNF, RASGRP1, RPS6KA5</p> <p><b>Osteoclast differentiation:</b> TGFBR2, MITF</p> <p><b>mTOR signaling pathway:</b> VEGFA</p> <p><b>Metabolic pathways:</b> DNMT1, DNMT3B</p> <p><b>VEGF signaling pathway:</b> VEGFA</p> |
| mir-148 | 7p15.2 | hsa-miR-148a  | miR-148a-3p | 1.650 | <p><b>Cell cycle:</b> CDC25B</p> <p><b>p53 signaling pathway:</b> CYCS</p> <p><b>Apoptosis:</b> CYCS</p> <p><b>Chemokine signaling pathway:</b> GNB5</p>                                                                                                                                                                                                                                                                                                                                                                                                                                                                                                                                                                                                                                                                                                                                                                                                                                                               |

|         |          |             |            |       |                                                                                                                                                                                                                                                                                                                                                                                                                                                                                                                                                                                                                                                                                                                                                                                                                                                                                                                                                                                                                                                                                           |
|---------|----------|-------------|------------|-------|-------------------------------------------------------------------------------------------------------------------------------------------------------------------------------------------------------------------------------------------------------------------------------------------------------------------------------------------------------------------------------------------------------------------------------------------------------------------------------------------------------------------------------------------------------------------------------------------------------------------------------------------------------------------------------------------------------------------------------------------------------------------------------------------------------------------------------------------------------------------------------------------------------------------------------------------------------------------------------------------------------------------------------------------------------------------------------------------|
|         |          |             |            |       | <b>MAPK signaling pathway:</b> CDC25B, RPS6KA5<br><b>Metabolic pathways:</b> UQCRCQ, DNMT3B, DNMT1                                                                                                                                                                                                                                                                                                                                                                                                                                                                                                                                                                                                                                                                                                                                                                                                                                                                                                                                                                                        |
| mir-296 | 20q13.32 | hsa-miR-296 | miR-296-5p | 3.083 | <b>Cell cycle:</b> CCND1, CDKN1B<br><b>p53 signaling pathway:</b> CCND1, BAX<br><b>PI3K-Akt signaling pathway:</b> CCND1, CDKN1B, BCL2, VEGFA, IFNA1, AKT1, PPP2R1B, PDGFRB<br><b>Wnt signaling pathway:</b> CCND1, PPP2R1B<br><b>Adhesion:</b> CCND1, BCL2, VEGFA, AKT1, KDR, ERBB2, PDGFRB<br><b>NF- kappa B signaling pathway:</b> BCL2, IL1B, IRAK1<br><b>HIF-1 signaling pathway:</b> CDKN1B, BCL2, VEGFA, ERBB2<br><b>Apoptosis:</b> BCL2, BAX, IL1B, IRAK1, AKT1<br><b>ErbB signaling pathway:</b> CDKN1B, STAT5A, AKT1, ERBB2<br><b>Chemokine signaling pathway:</b> AKT1<br><b>Adipocytokine signaling pathway:</b> AKT1<br><b>Cytokine-cytokine receptor interaction:</b> VEGFA, IFNA1, IL1B, KDR, PDGFRB<br><b>TGF-beta signaling pathway:</b> PPP2R1B<br><b>MAPK signaling pathway:</b> IL1B, AKT1, PDGFRB<br><b>Osteoclast differentiation:</b> IL1B, AKT1<br><b>Oocyte meiosis:</b> PPP2R1B<br><b>mTOR signaling pathway:</b> VEGFA, AKT1<br><b>Metabolic pathways:</b> ME1, ZNRD1<br><b>VEGF signaling pathway:</b> VEGFA, AKT1, KDR<br><b>PPAR signaling pathway:</b> ME1 |
| mir-296 | 20q13.32 | -           | miR-296-3p | 7.560 | <b>Cell cycle:</b> CCND1, CDKN1B<br><b>p53 signaling pathway:</b> CCND1, <u>BAX</u><br><b>PI3K-Akt signaling pathway:</b> CCND1, CDKN1B, BCL2, VEGFA, IFNA1, AKT1, PPP2R1B, PDGFRB<br><b>Wnt signaling pathway:</b> CCND1, PPP2R1B<br><b>Adhesion:</b> CCND1, BCL2, VEGFA, AKT1, <u>KDR</u> , ERBB2, PDGFRB<br><b>NF- kappa B signaling pathway:</b> BCL2, IL1B, IRAK1<br><b>HIF-1 signaling pathway:</b> CDKN1B, BCL2, VEGFA, ERBB2<br><b>Apoptosis:</b> BCL2, BAX, IL1B, IRAK1, AKT1<br><b>ErbB signaling pathway:</b> CDKN1B, STAT5A, AKT1, ERBB2                                                                                                                                                                                                                                                                                                                                                                                                                                                                                                                                      |

|         |        |              |            |       |                                                                                                                                                                                                                                                                                                                                                                                                                                                                                                                                                                                                                                                                                                                                                                                                                                                                                                                                                                                                                                                                                                                              |
|---------|--------|--------------|------------|-------|------------------------------------------------------------------------------------------------------------------------------------------------------------------------------------------------------------------------------------------------------------------------------------------------------------------------------------------------------------------------------------------------------------------------------------------------------------------------------------------------------------------------------------------------------------------------------------------------------------------------------------------------------------------------------------------------------------------------------------------------------------------------------------------------------------------------------------------------------------------------------------------------------------------------------------------------------------------------------------------------------------------------------------------------------------------------------------------------------------------------------|
|         |        |              |            |       | <p><b>Chemokine signaling pathway:</b> AKT1</p> <p><b>Adipocytokine signaling pathway:</b> AKT1</p> <p><b>Cytokine-cytokine receptor interaction:</b> VEGFA, IFNA1, IL1B, KDR, PDGFRB</p> <p><b>TGF-beta signaling pathway:</b> PPP2R1B</p> <p><b>MAPK signaling pathway:</b> IL1B, AKT1, PDGFRB, RASGRP3</p> <p><b>Osteoclast differentiation:</b> IL1B, AKT1</p> <p><b>Oocyte meiosis:</b> PPP2R1B</p> <p><b>mTOR signaling pathway:</b> VEGFA, AKT1</p> <p><b>Metabolic pathways:</b> ME1, ZNRD1</p> <p><b>VEGF signaling pathway:</b> VEGFA, AKT1, KDR</p> <p><b>PPAR signaling pathway:</b> ME1</p>                                                                                                                                                                                                                                                                                                                                                                                                                                                                                                                     |
| mir-335 | 7q32.2 | hsa-miR-335  | miR-335-5p | 4.416 | <p><b>Cell cycle:</b> RBL2, TP53, RB1</p> <p><b>p53 signaling pathway:</b> TP53</p> <p><b>PI3K-Akt signaling pathway:</b> TP53, TNC, CSF1, MAP2K1, FGFR1</p> <p><b>Wnt signaling pathway:</b> CTNNBIP1, TP53, MAPK9</p> <p><b>Adhesion:</b> IGF1R, TNC, MAPK9, MAP2K1, FGFR1</p> <p><b>HIF-1 signaling pathway:</b> MAP2K1</p> <p><b>Apoptosis:</b> TP53</p> <p><b>ErbB signaling pathway:</b> PLCG2, MAPK9, MAP2K1</p> <p><b>GnRH signaling pathway:</b> ITPR1, MAPK9, MAP2K1</p> <p><b>Chemokine signaling pathway:</b> MAP2K1</p> <p><b>Adipocytokine signaling pathway:</b> MAPK9</p> <p><b>Cytokine-cytokine receptor interaction:</b> CXCR7, CSF1</p> <p><b>TGF-beta signaling pathway:</b> ID4, SP1, RBL2</p> <p><b>MAPK signaling pathway:</b> FOS, NTRK2, RASA1, MAPK9, MAP2K1, FGFR1</p> <p><b>Osteoclast differentiation:</b> PLCG2, FOS, CSF1, FOSB, MAPK9, PPARG, MAP2K1</p> <p><b>Oocyte meiosis:</b> IGF1R, ITPR1, MAP2K1</p> <p><b>Metabolic pathways:</b> PLCG2, ACSL5, SAT1, ASAH1, FASN</p> <p><b>VEGF signaling pathway:</b> PLCG2, MAP2K1</p> <p><b>PPAR signaling pathway:</b> ACSL5, FABP4, PPARG</p> |
| mir-335 | 7q32.2 | hsa-miR-335* | miR-335-3p | 5.066 | <p><b>Cell cycle:</b> RBL2, TP53, RB1</p>                                                                                                                                                                                                                                                                                                                                                                                                                                                                                                                                                                                                                                                                                                                                                                                                                                                                                                                                                                                                                                                                                    |

|         |        |             |            |       |                                                                                                                                                                                                                                                                                                                                                                                                                                                                                                                                                                                                                                                                                                                                                                                                                                                                                                                                                                                                                                                                                    |
|---------|--------|-------------|------------|-------|------------------------------------------------------------------------------------------------------------------------------------------------------------------------------------------------------------------------------------------------------------------------------------------------------------------------------------------------------------------------------------------------------------------------------------------------------------------------------------------------------------------------------------------------------------------------------------------------------------------------------------------------------------------------------------------------------------------------------------------------------------------------------------------------------------------------------------------------------------------------------------------------------------------------------------------------------------------------------------------------------------------------------------------------------------------------------------|
|         |        |             |            |       | <p><b>p53 signaling pathway:</b> TP53</p> <p><b>PI3K-Akt signaling pathway:</b> TP53, TNC, CSF1, MAP2K1, FGFR1</p> <p><b>Wnt signaling pathway:</b> CTNNBIP1, TP53, MAPK9</p> <p><b>Adhesion:</b> IGF1R, TNC, MAPK9, MAP2K1, FGFR1</p> <p><b>HIF-1 signaling pathway:</b> MAP2K1</p> <p><b>Apoptosis:</b> TP53</p> <p><b>ErbB signaling pathway:</b> PLCG2, MAPK9, MAP2K1</p> <p><b>GnRH signaling pathway:</b> ITPR1, MAPK9, MAP2K1</p> <p><b>Chemokine signaling pathway:</b> MAP2K1</p> <p><b>Adipocytokine signaling pathway:</b> MAPK9</p> <p><b>Cytokine-cytokine receptor interaction:</b> CXCR7, CSF1</p> <p><b>TGF-beta signaling pathway:</b> ID4, SP1, RBL2</p> <p><b>MAPK signaling pathway:</b> FOS, NTRK2, RASA1, MAPK9, MAP2K1, FGFR1</p> <p><b>Osteoclast differentiation:</b> PLCG2, FOS, CSF1, FOSB, MAPK9, PPARG, MAP2K1</p> <p><b>Oocyte meiosis:</b> IGF1R, ITPR1, MAP2K1</p> <p><b>Metabolic pathways:</b> PLCG2, ACSL5, SAT1, ASAH1, FASN</p> <p><b>VEGF signaling pathway:</b> PLCG2, MAP2K1</p> <p><b>PPAR signaling pathway:</b> ACSL5, FABP4, PPARG</p> |
| mir-339 | 7p22.3 | hsa-miR-339 | miR-339-5p | 2.690 | <p><b>PI3K-Akt signaling pathway:</b> JAK2</p> <p><b>NF- kappa B signaling pathway:</b> ICAM1</p> <p><b>Chemokine signaling pathway:</b> JAK2</p> <p><b>Adipocytokine signaling pathway:</b> POMC, JAK2</p> <p><b>MAPK signaling pathway:</b> BDNF</p> <p><b>Metabolic pathways:</b> COX8A</p>                                                                                                                                                                                                                                                                                                                                                                                                                                                                                                                                                                                                                                                                                                                                                                                     |
| mir-339 | 7p22.3 | -           | miR-339-3p | 5.490 | <p><b>PI3K-Akt signaling pathway:</b> JAK2</p> <p><b>NF- kappa B signaling pathway:</b> ICAM1</p> <p><b>Chemokine signaling pathway:</b> JAK2</p> <p><b>Adipocytokine signaling pathway:</b> POMC, JAK2</p> <p><b>MAPK signaling pathway:</b> BDNF</p> <p><b>Metabolic pathways:</b> COX8A</p>                                                                                                                                                                                                                                                                                                                                                                                                                                                                                                                                                                                                                                                                                                                                                                                     |
| mir-340 | 5q35.3 | hsa-miR-340 | miR-340-5p | 3.283 | <p><b>PI3K-Akt signaling pathway:</b> MET</p> <p><b>Adhesion:</b> MET</p>                                                                                                                                                                                                                                                                                                                                                                                                                                                                                                                                                                                                                                                                                                                                                                                                                                                                                                                                                                                                          |

|                                                     |          |               |             |         |                                                                                                                                                                                                                                                                                                                                                                                                                                                                                      |
|-----------------------------------------------------|----------|---------------|-------------|---------|--------------------------------------------------------------------------------------------------------------------------------------------------------------------------------------------------------------------------------------------------------------------------------------------------------------------------------------------------------------------------------------------------------------------------------------------------------------------------------------|
|                                                     |          |               |             |         | <b>Cytokine-cytokine receptor interaction: MET</b><br><b>Osteoclast differentiation: MITF</b>                                                                                                                                                                                                                                                                                                                                                                                        |
| mir-340                                             | 5q35.3   | hsa-miR-340*  | miR-340-3p  | 1.922   | <b>Cell cycle: CDKN2A</b><br><b>p53 signaling pathway: CDKN2A, PTEN</b><br><b>PI3K-Akt signaling pathway: PTEN, PDGFA, HGF</b><br><b>Wnt signaling pathway: JUN</b><br><b>Adhesion: JUN, PTEN, PDGFA, HGF</b><br><b>ErbB signaling pathway: JUN</b><br><b>GnRH signaling pathway: JUN</b><br><b>Cytokine-cytokine receptor interaction: PDGFA, HGF</b><br><b>MAPK signaling pathway: JUN, PDGFA</b><br><b>Osteoclast differentiation: JUN</b><br><b>mTOR signaling pathway: PTEN</b> |
| mir-515                                             | 19q13.42 | hsa-miR-519e* | miR-519e-5p | 3.320   | <b>Cell cycle: CDKN1A</b><br><b>p53 signaling pathway: CDKN1A</b><br><b>Adhesion: PAK3</b><br><b>HIF-1 signaling pathway: CDKN1A</b><br><b>ErbB signaling pathway: PAK3, CDKN1A</b>                                                                                                                                                                                                                                                                                                  |
| mir-515                                             | 19q13.42 | hsa-miR-519e  | miR-519e-3p | 3.046   | <b>Cell cycle: CDKN1A</b><br><b>p53 signaling pathway: CDKN1A</b><br><b>ErbB signaling pathway: CDKN1A</b>                                                                                                                                                                                                                                                                                                                                                                           |
| mir-589                                             | 7p22.1   | hsa-miR-589   | miR-589-5p  | 2.410   | <b>No pathway for validated genes</b>                                                                                                                                                                                                                                                                                                                                                                                                                                                |
| mir-589                                             | 7p22.1   | hsa-miR-589*  | miR-589-3p  | 1.734   | <b>No pathway for validated genes</b>                                                                                                                                                                                                                                                                                                                                                                                                                                                |
| mir-744                                             | 7p12     | hsa-miR-744   | miR-744-5p  | 1.536   | <b>No pathway for validated genes</b>                                                                                                                                                                                                                                                                                                                                                                                                                                                |
| mir-744                                             | 7p12     | hsa-miR-744*  | miR-744-3p  | 3.393   | <b>No pathway for validated genes</b>                                                                                                                                                                                                                                                                                                                                                                                                                                                |
| mir-3180                                            | -        | -             | miR-3180-5p | 2.189   | <b>No pathway for validated genes</b>                                                                                                                                                                                                                                                                                                                                                                                                                                                |
| mir-3180                                            | -        | -             | miR-3180-3p | 6.780   | <b>No pathway for validated genes</b>                                                                                                                                                                                                                                                                                                                                                                                                                                                |
| <b>(II) Co-downregulated/-shutdown pairs (n=14)</b> |          |               |             |         |                                                                                                                                                                                                                                                                                                                                                                                                                                                                                      |
| mir-10                                              | 7q21.32  | hsa-miR-10a   | miR-10a-5p  | -12.420 | <b>Cell cycle: WEE1, CDK4, CCND1, MYC, TGFB1</b><br><b>p53 signaling pathway: BAX, CDK4, CCND1</b>                                                                                                                                                                                                                                                                                                                                                                                   |

|        |         |              |            |        |                                                                                                                                                                                                                                                                                                                                                                                                                                                                                                                                                                                                                                                                                                                                                                                                                                                                                                                                                                                                                                                                                                                                                                                                                                        |
|--------|---------|--------------|------------|--------|----------------------------------------------------------------------------------------------------------------------------------------------------------------------------------------------------------------------------------------------------------------------------------------------------------------------------------------------------------------------------------------------------------------------------------------------------------------------------------------------------------------------------------------------------------------------------------------------------------------------------------------------------------------------------------------------------------------------------------------------------------------------------------------------------------------------------------------------------------------------------------------------------------------------------------------------------------------------------------------------------------------------------------------------------------------------------------------------------------------------------------------------------------------------------------------------------------------------------------------|
|        |         |              |            |        | <p><b>PI3K-Akt signaling pathway:</b> JAK2, CDK4, ITGA2B, CCND1, MCL1, TLR4, MYC, IL6, CREB1, RELA, FGFR3</p> <p><b>Wnt signaling pathway:</b> MAP3K7, MAPK8, BTRC, CCND1, MYC, CAMK2B</p> <p><b>Adhesion:</b> ITGA2B, CCND1</p> <p><b>NF- kappa B signaling pathway:</b> TLR4, IRAK4, NFKBIA, RELA, MAP3K7</p> <p><b>HIF-1 signaling pathway:</b> TLR4, CAMK2B, IL6, RELA</p> <p><b>Apoptosis:</b> BAX, TNFSF10, IRAK4, NFKBIA, RELA</p> <p><b>ErbB signaling pathway:</b> CRK, MAPK8, MYC, CAMK2B</p> <p><b>GnRH signaling pathway:</b> MAPK8, CAMK2B</p> <p><b>Chemokine signaling pathway:</b> CRK, JAK2, CXCR4, NFKBIA, RELA, CCL2</p> <p><b>Adipocytokine signaling pathway:</b> MAPK8, JAK2, NFKBIA, RELA</p> <p><b>Cytokine-cytokine receptor interaction:</b> ACVR2A, FLT3, TNFSF10, TGFB1, IL6, CCL2</p> <p><b>TGF-beta signaling pathway:</b> ACVR2A, MYC</p> <p><b>MAPK signaling pathway:</b> MAP3K7, CRK, MAPK8, DUSP3, MAP3K8, BDNF, MYC, TGFB1, RELA, FGFR3</p> <p><b>Osteoclast differentiation:</b> MAP3K7, MAPK8, TGFB1, CREB1, NFKBIA, RELA</p> <p><b>Oocyte meiosis:</b> BTRC, CAMK2B</p> <p><b>mTOR signaling pathway:</b> PDPK1, ALG2</p> <p><b>Metabolic pathways:</b> NDUFB6, CMPK1, AMACR, DNMT1, DNMT3B</p> |
| mir-10 | 7q21.32 | hsa-miR-10a* | miR-10a-3p | -2.790 | <p><b>Cell cycle:</b> CDK4, CCND1, MYC, TGFB1</p> <p><b>p53 signaling pathway:</b> BAX, CDK4, CCND1</p> <p><b>PI3K-Akt signaling pathway:</b> JAK2, CDK4, ITGA2B, CCND1, MCL1, TLR4, MYC, IL6, CREB1, RELA, FGFR3</p> <p><b>Wnt signaling pathway:</b> BTRC, CCND1, MYC, CAMK2B, MAP3K7</p> <p><b>Adhesion:</b> ITGA2B, CCND1</p> <p><b>NF- kappa B signaling pathway:</b> TLR4, IRAK4, NFKBIA, RELA, MAP3K7</p> <p><b>HIF-1 signaling pathway:</b> TLR4, CAMK2B, IL6, RELA</p> <p><b>Apoptosis:</b> BAX, TNFSF10, IRAK4, NFKBIA, RELA</p> <p><b>ErbB signaling pathway:</b> MYC, CAMK2B</p> <p><b>GnRH signaling pathway:</b> CAMK2B</p> <p><b>Chemokine signaling pathway:</b> JAK2, CXCR4, NFKBIA, RELA, CCL2</p>                                                                                                                                                                                                                                                                                                                                                                                                                                                                                                                   |

|        |         |             |           |        |                                                                                                                                                                                                                                                                                                                                                                                                                                                                                                                                                                                                                                                                                                                                                                                                                                                                                                                                                                                                                                                                                                                                                                                                                                       |
|--------|---------|-------------|-----------|--------|---------------------------------------------------------------------------------------------------------------------------------------------------------------------------------------------------------------------------------------------------------------------------------------------------------------------------------------------------------------------------------------------------------------------------------------------------------------------------------------------------------------------------------------------------------------------------------------------------------------------------------------------------------------------------------------------------------------------------------------------------------------------------------------------------------------------------------------------------------------------------------------------------------------------------------------------------------------------------------------------------------------------------------------------------------------------------------------------------------------------------------------------------------------------------------------------------------------------------------------|
|        |         |             |           |        | <p><b>Adipocytokine signaling pathway:</b> NFKBIA, RELA</p> <p><b>Cytokine-cytokine receptor interaction:</b> CXCR4, FLT3, TNFSF10, TGFB1, IL6, CCL2</p> <p><b>TGF-beta signaling pathway:</b> TGFB1</p> <p><b>MAPK signaling pathway:</b> MAP3K8, BDNF, MYC, TGFB1, RELA, FGFR3, MAP3K7</p> <p><b>Osteoclast differentiation:</b> CREB1, NFKBIA, RELA, MAP3K7</p> <p><b>Oocyte meiosis:</b> BTRC, CAMK2B</p> <p><b>Metabolic pathways:</b> DNMT1, PTGS1, AMACR, ALG2, DNMT1, DNMT3B</p>                                                                                                                                                                                                                                                                                                                                                                                                                                                                                                                                                                                                                                                                                                                                              |
| mir-22 | 17p13.3 | hsa-miR-22* | miR-22-5p | -7.880 | <p><b>Cell cycle:</b> MYC, CDC25C</p> <p><b>p53 signaling pathway:</b> PTEN,</p> <p><b>PI3K-Akt signaling pathway:</b> TLR4, MYC, PTEN, FGF23, FRAP1, NFKB1, PIK3CA, AKT1,</p> <p><b>Wnt signaling pathway:</b> MYC</p> <p><b>Adhesion:</b> PTEN</p> <p><b>NF- kappa B signaling pathway:</b> TLR4, IL1B, NFKB1</p> <p><b>HIF-1 signaling pathway:</b> TFRC, TLR4, FRAP1, NFKB1, PIK3CA, AKT1, HMOX1</p> <p><b>Apoptosis:</b> IL1B, NFKB1, PIK3CA, AKT1</p> <p><b>ErbB signaling pathway:</b> MYC, FRAP1, PIK3CA, AKT1, ERBB3, MYC</p> <p><b>Chemokine signaling pathway:</b> CCL28, NFKB1, PIK3CA, AKT1</p> <p><b>Adipocytokine signaling pathway:</b> POMC, FRAP1, NFKB1, AKT1, CD36</p> <p><b>Cytokine-cytokine receptor interaction:</b> IL1B, CCL28, BMP7</p> <p><b>TGF-beta signaling pathway:</b> MYC, BMP7</p> <p><b>MAPK signaling pathway:</b> MYC, BDNF, IL1B, FGF23, EVI1, NFKB1, AKT1, MYC, MAX</p> <p><b>Osteoclast differentiation:</b> IL1B, NFKB1, PIK3CA, AKT1</p> <p><b>Oocyte meiosis:</b> CDC25C</p> <p><b>mTOR signaling pathway:</b> PTEN, FRAP1, PIK3CA, AKT1</p> <p><b>Metabolic pathways:</b> PAH, COX8A</p> <p><b>VEGF signaling pathway:</b> PIK3CA</p> <p><b>PPAR signaling pathway:</b> PPARA, CD36</p> |
| mir-22 | 17p13.3 | hsa-miR-22  | miR-22-3p | -4.527 | <p><b>Cell cycle:</b> E2F2, CDK6, CDKN1B, CDKN1C, MYC, MCM7, CDC25C</p>                                                                                                                                                                                                                                                                                                                                                                                                                                                                                                                                                                                                                                                                                                                                                                                                                                                                                                                                                                                                                                                                                                                                                               |

|        |         |               |             |        |                                                                                                                                                                                                                                                                                                                                                                                                                                                                                                                                                                                                                                                                                                                                                                                                                                                                                                                                                                                                                                                                                                                                                                                                                                                                                                                                                                                                                                             |
|--------|---------|---------------|-------------|--------|---------------------------------------------------------------------------------------------------------------------------------------------------------------------------------------------------------------------------------------------------------------------------------------------------------------------------------------------------------------------------------------------------------------------------------------------------------------------------------------------------------------------------------------------------------------------------------------------------------------------------------------------------------------------------------------------------------------------------------------------------------------------------------------------------------------------------------------------------------------------------------------------------------------------------------------------------------------------------------------------------------------------------------------------------------------------------------------------------------------------------------------------------------------------------------------------------------------------------------------------------------------------------------------------------------------------------------------------------------------------------------------------------------------------------------------------|
|        |         |               |             |        | <p><b>p53 signaling pathway:</b> CDK6,PTEN</p> <p><b>PI3K-Akt signaling pathway:</b> CDKN1B, KIT, FOXO3,DDIT4, TLR4, MYC, PTEN, FGF23, FRAP1, NFKB1, PIK3CA, AKT1</p> <p><b>Wnt signaling pathway:</b> FRAT2, PRKACA, CSNK2A1, MYC</p> <p><b>Adhesion:</b> PTEN</p> <p><b>NF- kappa B signaling pathway:</b> ICAM1, TLR4, IL1B, NFKB1</p> <p><b>HIF-1 signaling pathway:</b> TFRC, CDKN1B, TLR4,FRAP1, NFKB1, PIK3CA, AKT1, HMOX1</p> <p><b>Apoptosis:</b> PRKACA,TNFSF10, IL1B, NFKB1, PIK3CA, AKT1</p> <p><b>ErbB signaling pathway:</b> ERBB3, CDKN1B, MYC, FRAP1, PIK3CA, AKT1, ERBB3</p> <p><b>GnRH signaling pathway:</b> PRKACA</p> <p><b>Chemokine signaling pathway:</b> PRKACA, FOXO3, CCL28, NFKB1, PIK3CA, AKT1</p> <p><b>Adipocytokine signaling pathway:</b> PPARA, POMC, FRAP1, NFKB1, AKT1, CD36</p> <p><b>Cytokine-cytokine receptor interaction:</b> BMP7,TNFSF10, KIT, IL1B, CCL28</p> <p><b>TGF-beta signaling pathway:</b> SP1, BMP7, ACVR1C, MYC</p> <p><b>MAPK signaling pathway:</b> PRKACA, BDNF, FOS, MYC, IL1B, FGF23, EVI1, NFKB1, AKT1, MAX</p> <p><b>Osteoclast differentiation:</b> FOS, IL1B, NFKB1, PIK3CA, AKT1</p> <p><b>Oocyte meiosis:</b> PRKACA , CDC25C</p> <p><b>mTOR signaling pathway:</b> DDIT4, PTEN, FRAP1, PIK3CA, AKT1</p> <p><b>Metabolic pathways:</b> PIK3C2A, MAOA, PAH, COX8A</p> <p><b>VEGF signaling pathway:</b> PIK3CA, AKT1</p> <p><b>PPAR signaling pathway:</b> PPARA, CD36</p> |
| mir-24 | 9q22.32 | hsa-miR-24-1* | miR-24-1-5p | -1.927 | <p><b>Cell cycle:</b> CDKN1B, TGFB1, CDKN2A, CDKN1A, TP53</p> <p><b>p53 signaling pathway:</b> CDKN2A, CDKN1A, TP53</p> <p><b>PI3K-Akt signaling pathway:</b> PDGFB, CDKN1B, BRCA1, CDKN1A, TP53</p> <p><b>Wnt signaling pathway:</b> TP53</p> <p><b>HIF-1 signaling pathway:</b> CDKN1B, CDKN1A</p> <p><b>Apoptosis:</b> NTRK1, TP53</p> <p><b>ErbB signaling pathway:</b> CDKN1B, CDKN1A</p>                                                                                                                                                                                                                                                                                                                                                                                                                                                                                                                                                                                                                                                                                                                                                                                                                                                                                                                                                                                                                                              |



|        |         |            |           |        |                                                                                                                                                                                                                                                                                                                                                                                                                                                                                                                                                                                                                                                                                                                                                                                                                                                                                                                                                                                                                                                                                                                                                                                                                                                                                                                                                                                                                                          |
|--------|---------|------------|-----------|--------|------------------------------------------------------------------------------------------------------------------------------------------------------------------------------------------------------------------------------------------------------------------------------------------------------------------------------------------------------------------------------------------------------------------------------------------------------------------------------------------------------------------------------------------------------------------------------------------------------------------------------------------------------------------------------------------------------------------------------------------------------------------------------------------------------------------------------------------------------------------------------------------------------------------------------------------------------------------------------------------------------------------------------------------------------------------------------------------------------------------------------------------------------------------------------------------------------------------------------------------------------------------------------------------------------------------------------------------------------------------------------------------------------------------------------------------|
|        |         |            |           |        | <p><b>GnRH signaling pathway:</b> MAPK14</p> <p><b>Cytokine-cytokine receptor interaction:</b> PDGFB, TGFB1, ACVR1B</p> <p><b>TGF-beta signaling pathway:</b> TGFB1</p> <p><b>MAPK signaling pathway:</b> NTRK1, PDGFB, TGFB1, MAPK14, TP53</p> <p><b>Osteoclast differentiation:</b> TGFB1, MAPK14</p> <p><b>VEGF signaling pathway:</b>MAPK14</p> <p><b>Adhesion:</b> PDGFB</p>                                                                                                                                                                                                                                                                                                                                                                                                                                                                                                                                                                                                                                                                                                                                                                                                                                                                                                                                                                                                                                                        |
| mir-24 | 9q22.32 | hsa-miR-24 | miR-24-3p | -3.167 | <p><b>Cell cycle:</b> CDKN2A, MYC, E2F2, CDK4, CCNA2, CDKN1B, TGFB1, SMAD2, CDKN2A, CDKN1A, CDC2, TP53, TGFB1, CCNA2, CCNB1, SMC1A, CDKN1B, CDK4</p> <p><b>p53 signaling pathway:</b> CDKN2A, CDK4, CDKN2A, CDKN1A, PPM1D, CDC2, TP53, CCNB1, CDK4</p> <p><b>PI3K-Akt signaling pathway:</b> MYC, BRCA1, CDK4, CDKN1B, PDGFB, CDKN1A, VEGFA, BRCA1, KIT, TP53, PIK3CA, CDKN1B, CDK4, PDGFB, NOS3, LAMC2, FGF7</p> <p><b>Wnt signaling pathway:</b> MYC, NFAT5, SMAD2, JUN, TP53, FBXW11</p> <p><b>Adhesion:</b> PDGFB</p> <p><b>HIF-1 signaling pathway:</b> CDKN1B, HMOX1, CDKN1A, VEGFA, PIK3CA, CDKN1B, NOS2A,NOS3</p> <p><b>Apoptosis:</b> TP53, FADD, PIK3CA, AIFM1, NTRK1</p> <p><b>ErbB signaling pathway:</b> MYC, CDKN1B, JUN, MAP2K4, CDKN1A, PIK3CA, CDKN1B, NOS3</p> <p><b>GnRH signaling pathway:</b> JUN, MAPK14</p> <p><b>Cytokine-cytokine receptor interaction:</b> ACVR1B, TGFB1, PDGFB, ACVR1B, VEGFA, KIT, TGFB1, PDGFB</p> <p><b>TGF-beta signaling pathway:</b> MYC ,TGFB1, SMAD2, TGFB1</p> <p><b>MAPK signaling pathway:</b> MAPK14, MYC ,TGFB1, PDGFB, STK3, JUN, MAP2K4, MAPK14, MAPKAPK5, TP53, TGFB1, PDGFB, DDIT3, NTRK1, FGF7</p> <p><b>Osteoclast differentiation:</b> MAPK14,TGFB1, JUN, MAPK14, SPI1, PIK3CA</p> <p><b>Oocyte meiosis:</b> CDC2, FBXW11, CCNB1, SMC1A</p> <p><b>mTOR signaling pathway:</b> VEGFA, PIK3CA</p> <p><b>Metabolic pathways:</b> DHFR, POLD1, XYLT2POLD1, RPE, B3GALNT1,</p> |

|        |        |              |            |        |                                                                                                                                                                                                                                                                                                                                                                                                                                                                                                                                                                                                                                                                                                                                                                                                                                                                                                                                                                                                                                                                                                                                                                                                                                                                                                                                                                                                                                                                                                                                                                                                                                                                                                                           |
|--------|--------|--------------|------------|--------|---------------------------------------------------------------------------------------------------------------------------------------------------------------------------------------------------------------------------------------------------------------------------------------------------------------------------------------------------------------------------------------------------------------------------------------------------------------------------------------------------------------------------------------------------------------------------------------------------------------------------------------------------------------------------------------------------------------------------------------------------------------------------------------------------------------------------------------------------------------------------------------------------------------------------------------------------------------------------------------------------------------------------------------------------------------------------------------------------------------------------------------------------------------------------------------------------------------------------------------------------------------------------------------------------------------------------------------------------------------------------------------------------------------------------------------------------------------------------------------------------------------------------------------------------------------------------------------------------------------------------------------------------------------------------------------------------------------------------|
|        |        |              |            |        | RPIA, FASN, NME1, NOS2A, NOS3, DCXR<br><b>VEGF signaling pathway:</b> MAPK14, NFAT5, MAPK14, VEGFA, PIK3CA, NOS3                                                                                                                                                                                                                                                                                                                                                                                                                                                                                                                                                                                                                                                                                                                                                                                                                                                                                                                                                                                                                                                                                                                                                                                                                                                                                                                                                                                                                                                                                                                                                                                                          |
| mir-29 | 7q32.3 | hsa-miR-29a* | miR-29a-5p | -1.807 | <b>Cell cycle:</b> TGFB3, E2F1, SMAD3, CCND1, RB1, TGFB1, CDK6, CDK4, TGFB2, TP53, HDAC2, MYC<br><b>p53 signaling pathway:</b> CCND1, CDK6, CDK4, PPM1D, PTEN, TP53<br><b>PI3K-Akt signaling pathway:</b> IKBKB, PCK2, COL3A1, BCL2, RELA, PIK3CA, MCL1, CCND1, LAMC1, FASLG, CDK6, CDK4, COL5A3, IL4, PTEN, TP53, COL4A1, AKT1, MYC, COL1A1, BRCA1, COL4A2, TLR4, COL1A2, CD19<br><b>Wnt signaling pathway:</b> SMAD3, CCND1, CTNNBIP1, TP53, MYC, FZD5<br><b>Adhesion:</b> AKT1, COL3A1, COL5A3, COL4A1, PTEN<br><b>NF- kappa B signaling pathway:</b> IKBKB, BCL2, RELA, ZAP70, TLR4<br><b>HIF-1 signaling pathway:</b> BCL2, RELA, PIK3CA, GAPDH, IFNG, AKT1, TLR4<br><b>Apoptosis:</b> IKBKB, BCL2, RELA, PIK3CA, FASLG, TNFSF10<br><b>ErbB signaling pathway:</b> PIK3CA, PAK1, AKT1, MYC<br><b>GnRH signaling pathway:</b> CDC42, PIK3CA<br><b>Chemokine signaling pathway:</b> IKBKB, CDC42, RELA, PAK1, AKT1, CCR7<br><b>Adipocytokine signaling pathway:</b> IKBKB, PCK2, RELA, AKT1, PPARA<br><b>Cytokine-cytokine receptor interaction:</b> TGFB3, TGFB1, FASLG, TGFB2, IFNG, IL4, FLT3, ACVR2A, CCR7, TNFSF10, TNFRSF4<br><b>TGF-beta signaling pathway:</b> TGFB3, SMAD3, TGFB1, TGFB2, IFNG, MYC, ACVR2A<br><b>MAPK signaling pathway:</b> IKBKB, TGFB3, CDC42, RELA, PAK1, STMN1, TGFB1, FASLG, TGFB2, TP53, AKT1, MYC, DUSP2<br><b>Osteoclast differentiation:</b> IKBKB, SOCS1, RELA, PIK3CA, TGFB1, TGFB2, IFNG, AKT1<br><b>mTOR signaling pathway:</b> IKBKB, PIK3CA, PTEN, AKT1<br><b>Metabolic pathways:</b> PCK2, GLUL, IMPDH1, GAPDH, RDH10, DNMT1, DNMT3A, FH, DNMT3B, ME1, NOS1, COX8A<br><b>VEGF signaling pathway:</b> CDC42, PIK3CA, AKT1<br><b>PPAR signaling pathway:</b> PCK2, ME1, PPARA |

|        |        |                |              |        |                                                                                                                                                                                                                                                                                                                                                                                                                                                                                                                                                                                                                                                                                                                                                                                                                                                                                                                                                                                                                                                                                                                                                                                                                                                                                                                                                                                                                                                                                                                                                                                                                                                                                                                                                                                                                                                                                                                                    |
|--------|--------|----------------|--------------|--------|------------------------------------------------------------------------------------------------------------------------------------------------------------------------------------------------------------------------------------------------------------------------------------------------------------------------------------------------------------------------------------------------------------------------------------------------------------------------------------------------------------------------------------------------------------------------------------------------------------------------------------------------------------------------------------------------------------------------------------------------------------------------------------------------------------------------------------------------------------------------------------------------------------------------------------------------------------------------------------------------------------------------------------------------------------------------------------------------------------------------------------------------------------------------------------------------------------------------------------------------------------------------------------------------------------------------------------------------------------------------------------------------------------------------------------------------------------------------------------------------------------------------------------------------------------------------------------------------------------------------------------------------------------------------------------------------------------------------------------------------------------------------------------------------------------------------------------------------------------------------------------------------------------------------------------|
| mir-29 | 7q32.3 | hsa-miR-29a    | miR-29a-3p   | -6.487 | <p><b>Cell cycle:</b> CDK6,TGFB3, E2F1, SMAD3, CCND1, RB1, TGFB1, CDK4, TGFB2, TP53, HDAC2, MYC</p> <p><b>p53 signaling pathway:</b> CDK6, PTEN, PPM1D, CCND1, CDK4, TP53</p> <p><b>PI3K-Akt signaling pathway:</b> MCL1, BCL2, COL4A1, ADAMTS9, ITGA11, IKBKB, PCK2, COL3A1, RELA, PIK3CA, CCND1, LAMC1, FASLG, CDK4, BCL2, COL5A3, IL4, TP53, AKT1, MYC, COL1A1, BRCA1, COL4A2, TLR4, COL1A2, COL3A1, CD19, PTEN</p> <p><b>Wnt signaling pathway:</b> SFRP2, DKK1, SMAD3, CCND1, CTNNBIP1, TP53, MYC, FZD5</p> <p><b>Adhesion:</b> PTEN, AKT1,COL3A1, COL5A3, COL4A1</p> <p><b>NF- kappa B signaling pathway:</b> BCL2, IKBKB, RELA, BCL2, ZAP70, TLR4</p> <p><b>HIF-1 signaling pathway:</b> BCL2, RELA, PIK3CA, GAPDH, BCL2, IFNG, AKT1, TLR4</p> <p><b>Apoptosis:</b> BCL2, PIK3R1, BCL2, IKBKB, RELA, PIK3CA, FASLG, BCL2, TP53, AKT1, TNFSF10</p> <p><b>ErbB signaling pathway:</b> PIK3R1, PIK3CA, PAK1, AKT1, MYC</p> <p><b>GnRH signaling pathway:</b> CDC42</p> <p><b>Chemokine signaling pathway:</b> PIK3R1, IKBKB, CDC42, RELA, PIK3CA, PAK1, AKT1, CCR7</p> <p><b>Adipocytokine signaling pathway:</b> IKBKB, PCK2, RELA, AKT1, PPARA</p> <p><b>Cytokine-cytokine receptor interaction:</b> TGFB3, TGFB1, FASLG, TGFB2, IFNG, IL4, FLT3, ACVR2A, CCR7, TNFSF10, TNFRSF4</p> <p><b>TGF-beta signaling pathway:</b> TGFB3, SMAD3, TGFB1, TGFB2, IFNG, MYC, ACVR2A</p> <p><b>MAPK signaling pathway:</b> IKBKB, TGFB3, CDC42, RELA, STMN1, TGFB1, FASLG, TGFB2, TP53, AKT1, MYC, ME1, DUSP2</p> <p><b>Osteoclast differentiation:</b> PIK3R1, IKBKB, RELA, PIK3CA, TGFB1, TGFB2, IFNG, AKT1</p> <p><b>mTOR signaling pathway:</b> IKBKB, PIK3CA, AKT1, PTEN</p> <p><b>Metabolic pathways:</b> DNMT3B, DNMT3A, IMPDH1, GLUL, PCK2, IMPDH1, PAK1, GAPDH, RDH10, DNMT1, FH, NOS1, COX8A</p> <p><b>VEGF signaling pathway:</b> PIK3R1, CDC42, PIK3CA, AKT1</p> <p><b>PPAR signaling pathway:</b> LPL, PCK2, ME1, PPARA</p> |
| mir-29 | 7q32.3 | hsa-miR-29b-1* | miR-29b-1-5p | -5.000 | <p><b>Cell cycle:</b> CDK6, CCND1, SMAD3, CDK4, TGFB3, TGFB1, TGFB2,</p>                                                                                                                                                                                                                                                                                                                                                                                                                                                                                                                                                                                                                                                                                                                                                                                                                                                                                                                                                                                                                                                                                                                                                                                                                                                                                                                                                                                                                                                                                                                                                                                                                                                                                                                                                                                                                                                           |

|        |        |             |            |        |                                                                                                                                                                                                                                                                                                                                                                                                                                                                                                                                                                                                                                                                                                                                                                                                                                                                                                                                                                                                                                                                                                                                                                                                                                                                                                                                                                           |
|--------|--------|-------------|------------|--------|---------------------------------------------------------------------------------------------------------------------------------------------------------------------------------------------------------------------------------------------------------------------------------------------------------------------------------------------------------------------------------------------------------------------------------------------------------------------------------------------------------------------------------------------------------------------------------------------------------------------------------------------------------------------------------------------------------------------------------------------------------------------------------------------------------------------------------------------------------------------------------------------------------------------------------------------------------------------------------------------------------------------------------------------------------------------------------------------------------------------------------------------------------------------------------------------------------------------------------------------------------------------------------------------------------------------------------------------------------------------------|
|        |        |             |            |        | <p>CDKN2B, E2F1, TP53</p> <p><b>p53 signaling pathway:</b> CDK6, CCND1, CDK4, PTEN, TP53</p> <p><b>PI3K-Akt signaling pathway:</b> COL1A1, CDK6, TLR4, CCND1, COL1A2, BCL2, CDK4, FASLG, COL3A1, COL4A1, PIK3CA, PTEN, BRCA1, IL4, TP53</p> <p><b>Wnt signaling pathway:</b> CCND1, SMAD3, CTNNBIP1, TP53</p> <p><b>Adhesion:</b> COL1A1, CCND1, COL1A2, BCL2, COL3A1, COL4A1, CDC42, PAK1, PTEN</p> <p><b>NF- kappa B signaling pathway:</b> TLR4, BCL2, ZAP70</p> <p><b>HIF-1 signaling pathway:</b> TLR4, BCL2, PIK3CA</p> <p><b>Apoptosis:</b> TNFSF10, BCL2, FASLG, PIK3CA, TP53</p> <p><b>ErbB signaling pathway:</b> PIK3CA PAK1</p> <p><b>GnRH signaling pathway:</b> CDC42</p> <p><b>Chemokine signaling pathway:</b> CDC42, PIK3CA, PAK1</p> <p><b>Adipocytokine signaling pathway:</b> PPARA</p> <p><b>Cytokine-cytokine receptor interaction:</b> TNFSF10, FASLG, TGFB3, TGFB1, TGFB2, IL4</p> <p><b>TGF-beta signaling pathway:</b> TGFB3, TGFB1, TGFB2, CDKN2B</p> <p><b>MAPK signaling pathway:</b> DUSP2, FASLG, TGFB3, TGFB1, CDC42, TGFB2, PAK1, TP53</p> <p><b>Osteoclast differentiation:</b> TGFB1, TGFB2, PIK3CA</p> <p><b>mTOR signaling pathway:</b> PIK3CA, PTEN</p> <p><b>Metabolic pathways:</b> NOS1, RDH10, DNMT3A, FH, DNMT3B, ME1</p> <p><b>VEGF signaling pathway:</b> CDC42, PIK3CA</p> <p><b>PPAR signaling pathway:</b> ME1, PPARA</p> |
| mir-29 | 7q32.3 | hsa-miR-29b | miR-29b-3p | -4.553 | <p><b>Cell cycle:</b> CDK6, CCND1, SMAD3, CDK4, TGFB3, TGFB1, TGFB2, CDKN2B, E2F1, TP53, CDKN2A, E2F3</p> <p><b>p53 signaling pathway:</b> CDK6, CCND1, CDK4, PTEN, TP53, IGF1, CDKN2A</p> <p><b>PI3K-Akt signaling pathway:</b> COL1A1, CDK6, TLR4, CCND1, COL1A2, BCL2, CDK4, FASLG, COL3A1, COL4A1, PIK3CA, PTEN, BRCA1, IL4, TP53, VEGFA, KRAS</p> <p><b>Wnt signaling pathway:</b> CCND1, SMAD3, CTNNBIP1, TP53</p> <p><b>Adhesion:</b> COL1A1, CCND1, COL1A2, BCL2, COL3A1, COL4A1, CDC42, IGF1,PAK1, PTEN, VEGFA</p>                                                                                                                                                                                                                                                                                                                                                                                                                                                                                                                                                                                                                                                                                                                                                                                                                                               |

|        |        |            |           |        |                                                                                                                                                                                                                                                                                                                                                                                                                                                                                                                                                                                                                                                                                                                                                                                                                                                                                                                                                                                                                                                                                                                                                     |
|--------|--------|------------|-----------|--------|-----------------------------------------------------------------------------------------------------------------------------------------------------------------------------------------------------------------------------------------------------------------------------------------------------------------------------------------------------------------------------------------------------------------------------------------------------------------------------------------------------------------------------------------------------------------------------------------------------------------------------------------------------------------------------------------------------------------------------------------------------------------------------------------------------------------------------------------------------------------------------------------------------------------------------------------------------------------------------------------------------------------------------------------------------------------------------------------------------------------------------------------------------|
|        |        |            |           |        | <p><b>NF- kappa B signaling pathway:</b> TLR4, BCL2, ZAP70, PTGS2, IL1B, IRAK1</p> <p><b>HIF-1 signaling pathway:</b> TLR4, BCL2, PIK3CA, IGF1, VEGFA</p> <p><b>Apoptosis:</b> TNFSF10, BCL2, FASLG, PIK3CA, TP53, IL1B, IRAK1</p> <p><b>ErbB signaling pathway:</b> PIK3CA PAK1, KRAS</p> <p><b>GnRH signaling pathway:</b> CDC42, KRAS</p> <p><b>Chemokine signaling pathway:</b> CDC42, PIK3CA, PAK1, KRAS</p> <p><b>Adipocytokine signaling pathway:</b> PPARA</p> <p><b>Cytokine-cytokine receptor interaction:</b> TNFSF10, FASLG, TGFB3, TGFB1, TGFB2, IL4, VEGFA, IL1B</p> <p><b>TGF-beta signaling pathway:</b> TGFB3, TGFB1, TGFB2, CDKN2B, ID3</p> <p><b>MAPK signaling pathway:</b> DUSP2, FASLG, TGFB3, TGFB1, CDC42, TGFB2, PAK1, TP53, IL1B, KRAS</p> <p><b>Osteoclast differentiation:</b> TGFB1, TGFB2, PIK3CA, IL1B</p> <p><b>mTOR signaling pathway:</b> PIK3CA, PTEN, IGF1, VEGFA</p> <p><b>Metabolic pathways:</b> NOS1, RDH10, DNMT3A, FH, DNMT3B, ME1, PTGS2</p> <p><b>VEGF signaling pathway:</b> CDC42, PIK3CA, PTGS2, VEGFA, KRAS</p> <p><b>PPAR signaling pathway:</b> ME1, PPARA</p> <p><b>Oocyte meiosis:</b> IGF1</p> |
| mir-31 | 9p21.3 | hsa-miR-31 | miR-31-5p | -4.737 | <p><b>Cell cycle:</b> CDKN2B, CDKN2A, CDKN2D, MCM2, E2F3, E2F2, MYC, TP53</p> <p><b>p53 signaling pathway:</b> CDKN2A, BAX, TP53, PTEN</p> <p><b>PI3K-Akt signaling pathway:</b> PPP2R2A, MYC, IBSP, TP53, JAK2, PTEN, MYB, FGFR3</p> <p><b>Wnt signaling pathway:</b> RHOA, FZD3, NFAT5, DKK1, SFRP1, SFRP4, WIF1, DKK1, MYC, TP53</p> <p><b>Adhesion:</b> RHOA, ITGA5, IBSP, PTEN</p> <p><b>NF- kappa B signaling pathway:</b> ICAM1, TNF</p> <p><b>HIF-1 signaling pathway:</b> HIF1A</p> <p><b>Apoptosis:</b> BAX, TNF, TP53</p> <p><b>ErbB signaling pathway:</b> MYC, HBEGF</p> <p><b>GnRH signaling pathway:</b> HBEGF</p> <p><b>Chemokine signaling pathway:</b> RHOA, TIAM1, CXCL12, CCL16, JAK2</p> <p><b>Adipocytokine signaling pathway:</b> TNF, JAK2</p>                                                                                                                                                                                                                                                                                                                                                                              |

|         |        |             |            |         |                                                                                                                                                                                                                                                                                                                                                                                                                                                                                                                                                                                                                                                                                                                                                                                                                                                                                                                                                                                                                                                                                                                                                               |
|---------|--------|-------------|------------|---------|---------------------------------------------------------------------------------------------------------------------------------------------------------------------------------------------------------------------------------------------------------------------------------------------------------------------------------------------------------------------------------------------------------------------------------------------------------------------------------------------------------------------------------------------------------------------------------------------------------------------------------------------------------------------------------------------------------------------------------------------------------------------------------------------------------------------------------------------------------------------------------------------------------------------------------------------------------------------------------------------------------------------------------------------------------------------------------------------------------------------------------------------------------------|
|         |        |             |            |         | <p><b>Cytokine-cytokine receptor interaction:</b> CXCL12, TNF, CCL16<br/> <b>TGF-beta signaling pathway:</b> RHOA, CDKN2B, TNF, MYC, DCN<br/> <b>MAPK signaling pathway:</b> FOS, TNF, STMN1, MYC, TP53, FGFR3<br/> <b>Osteoclast differentiation:</b> FOS, TNF<br/> <b>mTOR signaling pathway:</b> TNF, PTEN, HIF1A<br/> <b>Metabolic pathways:</b> MTAP, COX8A<br/> <b>VEGF signaling pathway:</b> NFAT5<br/> (All are based on validated genes from Tarbase, miRTarBase, miRWalk and NCBI website)</p>                                                                                                                                                                                                                                                                                                                                                                                                                                                                                                                                                                                                                                                     |
| mir-31  | 9p21.3 | hsa-miR-31* | miR-31-3p  | -4.447  | <p><b>Cell cycle:</b> CDKN2B, CDKN2A, CDKN2D, MCM2, E2F3, E2F2, MYC, TP53<br/> <b>p53 signaling pathway:</b> CDKN2A, BAX, TP53, PTEN<br/> <b>PI3K-Akt signaling pathway:</b> PPP2R2A, MYC, IBSP, TP53, JAK2, PTEN, MYB, FGFR3<br/> <b>Wnt signaling pathway:</b> RHOA, FZD3, NFAT5, DKK1, SFRP1, SFRP4, WIF1, DKK1, MYC, TP53<br/> <b>Adhesion:</b> RHOA, ITGA5, IBSP, PTEN<br/> <b>NF- kappa B signaling pathway:</b> ICAM1, TNF<br/> <b>HIF-1 signaling pathway:</b> HIF1A<br/> <b>Apoptosis:</b> BAX, TNF, TP53<br/> <b>ErbB signaling pathway:</b> MYC, HBEGF<br/> <b>GnRH signaling pathway:</b> HBEGF<br/> <b>Chemokine signaling pathway:</b> RHOA, TIAM1, CXCL12, CCL16, JAK2<br/> <b>Adipocytokine signaling pathway:</b> TNF, JAK2<br/> <b>Cytokine-cytokine receptor interaction:</b> CXCL12, TNF, CCL16<br/> <b>TGF-beta signaling pathway:</b> RHOA, CDKN2B, TNF, MYC, DCN<br/> <b>MAPK signaling pathway:</b> FOS, TNF, STMN1, MYC, TP53, FGFR3<br/> <b>Osteoclast differentiation:</b> FOS, TNF<br/> <b>mTOR signaling pathway:</b> TNF, PTEN, HIF1A<br/> <b>Metabolic pathways:</b> MTAP, COX8A<br/> <b>VEGF signaling pathway:</b> NFAT5</p> |
| mir-145 | 5q32   | hsa-miR-145 | miR-145-5p | -4.8407 | <p><b>Cell cycle:</b> MYC, CDKN1A, CCND1, TP53, E2F3, SMC1A, CDK4<br/> <b>p53 signaling pathway:</b> CDKN1A, PPM1D, CCND1, TP53, PTEN, CDK4, TSC2, TP73<br/> <b>PI3K-Akt signaling pathway:</b> CCND1, TP53, VEGFA, CREB1, AKT1,</p>                                                                                                                                                                                                                                                                                                                                                                                                                                                                                                                                                                                                                                                                                                                                                                                                                                                                                                                          |

|         |      |              |            |         |                                                                                                                                                                                                                                                                                                                                                                                                                                                                                                                                                                                                                                                                                                                                                                                                                                                                                                                                                                                                                                                                                                                                                                                                                                                                                                                                                                                                                                                                                                                                                                                                                                                                                                                                     |
|---------|------|--------------|------------|---------|-------------------------------------------------------------------------------------------------------------------------------------------------------------------------------------------------------------------------------------------------------------------------------------------------------------------------------------------------------------------------------------------------------------------------------------------------------------------------------------------------------------------------------------------------------------------------------------------------------------------------------------------------------------------------------------------------------------------------------------------------------------------------------------------------------------------------------------------------------------------------------------------------------------------------------------------------------------------------------------------------------------------------------------------------------------------------------------------------------------------------------------------------------------------------------------------------------------------------------------------------------------------------------------------------------------------------------------------------------------------------------------------------------------------------------------------------------------------------------------------------------------------------------------------------------------------------------------------------------------------------------------------------------------------------------------------------------------------------------------|
|         |      |              |            |         | <p>BCL2, EIF4E, PDGFB, PTEN, EGF, MTOR, KRAS, IFNA1, LAMC2, RPS6KB1, CDK4, TSC2, EIF4EBP1, MCL1</p> <p><b>Wnt signaling pathway:</b> PPP3CA, MYC, FZD7, CCND1, TP53, CTNNB1, FBXW11</p> <p><b>Adhesion:</b> F11R, CCND1, ERBB2, VEGFA, CTNNB1, AKT1, BCL2, PAK3, PDGFB, PAK1, PTEN, SRC, EGF, LAMC2, BIRC2, ACTG1</p> <p><b>NF- kappa B signaling pathway:</b> BCL2, BIRC2</p> <p><b>HIF-1 signaling pathway:</b> ERBB2, VEGFA, AKT1, BCL2, EIF4E, EGF, MTOR, RPS6KB1, IFNG, EIF4EBP1, PGK1</p> <p><b>Apoptosis:</b> PPP3CA, DFFA, TP53, AKT1, BCL2, TNFSF10, BIRC2</p> <p><b>ErbB signaling pathway:</b> MYC, CDKN1A, ERBB2, AKT1, PAK3, PAK1, SRC, EGF, MTOR, KRAS, RPS6KB1, EIF4EBP1</p> <p><b>GnRH signaling pathway:</b> MAP2K6, MMP14, SRC, KRAS, MAPK14</p> <p><b>Chemokine signaling pathway:</b> STAT1, AKT1, PAK1, SRC, KRAS,</p> <p><b>Adipocytokine signaling pathway:</b> IRS1, AKT1, MTOR</p> <p><b>Cytokine-cytokine receptor interaction:</b> IFNB1, VEGFA, TGFBR2, PDGFB, EGF, IFNA1, IFNG, TNFSF10</p> <p><b>TGF-beta signaling pathway:</b> MYC, TGFBR2, RPS6KB1, IFNG</p> <p><b>MAPK signaling pathway:</b> MAP2K6, PPP3CA, MYC, TP53, TGFBR2, AKT1, PDGFB, PAK1, EGF, KRAS, STK3, MAPK14</p> <p><b>Osteoclast differentiation:</b> MAP2K6, PPP3CA, IFNB1, STAT1, CREB1, TGFBR2, AKT1, IFNG, MAPK14, SPI1</p> <p><b>Oocyte meiosis:</b> PPP3CA, IGF1R, FBXW11, SMC1A</p> <p><b>mTOR signaling pathway:</b> VEGFA, AKT1, EIF4E, PTEN, MTOR, RPS6KB1, TSC2, EIF4EBP1</p> <p><b>Metabolic pathways:</b> AKR1B10, ALPPL2, ALDH3A1, NDUFA4, PIGF, COX8A, RPIA, SMPD1, POLD3, PGK1</p> <p><b>VEGF signaling pathway:</b> PPP3CA, VEGFA, AKT1, SRC, KRAS, MAPK14</p> <p><b>PPAR signaling pathway:</b> MMP1, FABP4</p> |
| mir-145 | 5q32 | hsa-miR-145* | miR-145-3p | -2.0969 | <p><b>Cell cycle:</b> MYC, CDKN1A, CCND1, TP53, E2F3, SMC1A, CDK4</p> <p><b>p53 signaling pathway:</b> CDKN1A, PPM1D, CCND1, TP53, PTEN, CDK4, TSC2, TP73</p> <p><b>PI3K-Akt signaling pathway:</b> CCND1, TP53, VEGFA, CREB1, AKT1, BCL2, EIF4E, PDGFB, PTEN, EGF, MTOR, KRAS, IFNA1, LAMC2,</p>                                                                                                                                                                                                                                                                                                                                                                                                                                                                                                                                                                                                                                                                                                                                                                                                                                                                                                                                                                                                                                                                                                                                                                                                                                                                                                                                                                                                                                   |

|         |         |   |             |         |                                                                                                                                                                                                                                                                                                                                                                                                                                                                                                                                                                                                                                                                                                                                                                                                                                                                                                                                                                                                                                                                                                                                                                                                                                                                                                                                                                                                                                                                                                                                                                                                                                                                            |
|---------|---------|---|-------------|---------|----------------------------------------------------------------------------------------------------------------------------------------------------------------------------------------------------------------------------------------------------------------------------------------------------------------------------------------------------------------------------------------------------------------------------------------------------------------------------------------------------------------------------------------------------------------------------------------------------------------------------------------------------------------------------------------------------------------------------------------------------------------------------------------------------------------------------------------------------------------------------------------------------------------------------------------------------------------------------------------------------------------------------------------------------------------------------------------------------------------------------------------------------------------------------------------------------------------------------------------------------------------------------------------------------------------------------------------------------------------------------------------------------------------------------------------------------------------------------------------------------------------------------------------------------------------------------------------------------------------------------------------------------------------------------|
|         |         |   |             |         | <p>RPS6KB1, CDK4, TSC2, EIF4EBP1, MCL1</p> <p><b>Wnt signaling pathway:</b> PPP3CA, MYC, FZD7, CCND1, TP53, CTNNB1, FBXW11</p> <p><b>Adhesion:</b> F11R, CCND1, ERBB2, VEGFA, CTNNB1, AKT1, BCL2, PAK3, PDGFB, PAK1, PTEN, SRC, EGF, LAMC2, BIRC2, ACTG1</p> <p><b>NF- kappa B signaling pathway:</b> BCL2, BIRC2</p> <p><b>HIF-1 signaling pathway:</b> ERBB2, VEGFA, AKT1, BCL2, EIF4E, EGF, MTOR, RPS6KB1, IFNG, EIF4EBP1, PGK1</p> <p><b>Apoptosis:</b> PPP3CA, DFFA, TP53, AKT1, BCL2, TNFSF10, BIRC2</p> <p><b>ErbB signaling pathway:</b> MYC, CDKN1A, ERBB2, AKT1, PAK3, PAK1, SRC, EGF, MTOR, KRAS, RPS6KB1, EIF4EBP1</p> <p><b>GnRH signaling pathway:</b> MAP2K6, MMP14, SRC, KRAS, MAPK14</p> <p><b>Chemokine signaling pathway:</b> STAT1, AKT1, PAK1, SRC, KRAS,</p> <p><b>Adipocytokine signaling pathway:</b> IRS1, AKT1, MTOR</p> <p><b>Cytokine-cytokine receptor interaction:</b> IFNB1, VEGFA, TGFBR2, PDGFB, EGF, IFNA1, IFNG, TNFSF10</p> <p><b>TGF-beta signaling pathway:</b> MYC, TGFBR2, RPS6KB1, IFNG</p> <p><b>MAPK signaling pathway:</b> MAP2K6, PPP3CA, MYC, TP53, TGFBR2, AKT1, PDGFB, PAK1, EGF, KRAS, STK3, MAPK14</p> <p><b>Osteoclast differentiation:</b> MAP2K6, PPP3CA, IFNB1, STAT1, CREB1, TGFBR2, AKT1, IFNG, MAPK14, SPI1</p> <p><b>Oocyte meiosis:</b> PPP3CA, IGF1R, FBXW11, SMC1A</p> <p><b>mTOR signaling pathway:</b> VEGFA, AKT1, EIF4E, PTEN, MTOR, RPS6KB1, TSC2, EIF4EBP1</p> <p><b>Metabolic pathways:</b> AKR1B10, ALPPL2, ALDH3A1, NDUFA4, PIGF, COX8A, RPIA, SMPD1, POLD3, PGK1</p> <p><b>VEGF signaling pathway:</b> PPP3CA, VEGFA, AKT1, SRC, KRAS, MAPK14</p> <p><b>PPAR signaling pathway:</b> MMP1, FABP4</p> |
| mir-193 | 17q11.2 | - | miR-193a-5p | -4.6307 | <p><b>Cell cycle:</b> CDK6, TGFB1, TP53</p> <p><b>p53 signaling pathway:</b> TP73, CDK6, TP73</p> <p><b>PI3K-Akt signaling pathway:</b> CDK6, MCL1, PTK2, NRAS, TP53</p> <p><b>Wnt signaling pathway:</b> CTNNB1, TP53</p> <p><b>Adhesion:</b> CTNNB1, BRAF, PTK2</p> <p><b>Apoptosis:</b> TP53</p>                                                                                                                                                                                                                                                                                                                                                                                                                                                                                                                                                                                                                                                                                                                                                                                                                                                                                                                                                                                                                                                                                                                                                                                                                                                                                                                                                                        |



|         |         |              |             |        |                                                                                                                                                                                                                                                                                                                                                                                                                                                                                                                                                                                                                                                                                                                                                                                                                                                                                                                                                                                                                                               |
|---------|---------|--------------|-------------|--------|-----------------------------------------------------------------------------------------------------------------------------------------------------------------------------------------------------------------------------------------------------------------------------------------------------------------------------------------------------------------------------------------------------------------------------------------------------------------------------------------------------------------------------------------------------------------------------------------------------------------------------------------------------------------------------------------------------------------------------------------------------------------------------------------------------------------------------------------------------------------------------------------------------------------------------------------------------------------------------------------------------------------------------------------------|
|         |         |              |             |        | <p><b>ErbB signaling pathway:</b> BRAF, PTK2, NRAS<br/> <b>GnRH signaling pathway:</b> NRAS<br/> <b>Chemokine signaling pathway:</b> BRAF, PTK2, NRAS<br/> <b>Cytokine-cytokine receptor interaction:</b> TGFB1<br/> <b>TGF-beta signaling pathway:</b> TGFB1<br/> <b>MAPK signaling pathway:</b> BRAF, TGFB1, NRAS, TP53<br/> <b>Osteoclast differentiation:</b> TGFB1<br/> <b>mTOR signaling pathway:</b> BRAF<br/> <b>Metabolic pathways:</b> DNMT1<br/> <b>VEGF signaling pathway:</b> PTK2, NRAS</p>                                                                                                                                                                                                                                                                                                                                                                                                                                                                                                                                     |
| mir-193 | 17q11.2 | hsa-miR-193a | miR-193a-3p | -2.026 | <p><b>Cell cycle:</b> CDK6, TGFB1, TP53, E2F3<br/> <b>p53 signaling pathway:</b> TP73, CDK6, TP73<br/> <b>PI3K-Akt signaling pathway:</b> CDK6, MCL1, PTK2, NRAS, TP53<br/> <b>Wnt signaling pathway:</b> CTNNB1, TP53<br/> <b>Adhesion:</b> CTNNB1, BRAF, PTK2<br/> <b>Apoptosis:</b> TP53, IL1B, TNF<br/> <b>ErbB signaling pathway:</b> BRAF, PTK2, NRAS<br/> <b>GnRH signaling pathway:</b> NRAS<br/> <b>Chemokine signaling pathway:</b> BRAF, PTK2, NRAS<br/> <b>Cytokine-cytokine receptor interaction:</b> TGFB1, IFNG, IL1B, TNF<br/> <b>TGF-beta signaling pathway:</b> TGFB1, IFNG, TNF<br/> <b>MAPK signaling pathway:</b> BRAF, TGFB1, NRAS, TP53, IL1B, TNF<br/> <b>Osteoclast differentiation:</b> TGFB1, IFNG, IL1B, TNF<br/> <b>mTOR signaling pathway:</b> BRAF, TNF<br/> <b>Metabolic pathways:</b> DNMT1, CYP7A1, NOS2<br/> <b>VEGF signaling pathway:</b> PTK2, NRAS<br/> <b>PPAR signaling pathway:</b> CYP7A1<br/> <b>HIF-1 signaling pathway:</b> IFNG, NOS2<br/> <b>NF- kappa B signaling pathway:</b> IL1B, TNF</p> |
| mir-199 | 19p13.2 | hsa-miR-199a | miR-199a-5p | -7.677 | <p><b>p53 signaling pathway:</b> PTEN<br/> <b>PI3K-Akt signaling pathway:</b> IKBKB, MAPK1, AKT1, FASLG, PTEN, NFKB1, INSR, MET<br/> <b>Wnt signaling pathway:</b> MAPK8, MAPK9<br/> <b>Adhesion:</b> MAPK1, AKT1, PTEN, MAPK8, MAPK9, MET</p>                                                                                                                                                                                                                                                                                                                                                                                                                                                                                                                                                                                                                                                                                                                                                                                                |

|         |         |               |             |        |                                                                                                                                                                                                                                                                                                                                                                                                                                                                                                                                                                                                                                                                                                                                                                                                                                                                                                                                                                                                                                         |
|---------|---------|---------------|-------------|--------|-----------------------------------------------------------------------------------------------------------------------------------------------------------------------------------------------------------------------------------------------------------------------------------------------------------------------------------------------------------------------------------------------------------------------------------------------------------------------------------------------------------------------------------------------------------------------------------------------------------------------------------------------------------------------------------------------------------------------------------------------------------------------------------------------------------------------------------------------------------------------------------------------------------------------------------------------------------------------------------------------------------------------------------------|
|         |         |               |             |        | <p><b>NF- kappa B signaling pathway:</b> IKBKB, NFKB1</p> <p><b>HIF-1 signaling pathway:</b> HIF1A, MAPK1, AKT1, NFKB1, INSR</p> <p><b>Apoptosis:</b> IKBKB, AKT1, FASLG, NFKB1</p> <p><b>ErbB signaling pathway:</b> MAPK1, AKT1, MAPK8, MAPK9</p> <p><b>GnRH signaling pathway:</b> MAPK1, MAPK14, MAPK8, MAPK9</p> <p><b>Chemokine signaling pathway:</b> IKBKB, MAPK1, AKT1, NFKB1</p> <p><b>Adipocytokine signaling pathway:</b> IKBKB, AKT1, MAPK8, MAPK9, NFKB1</p> <p><b>Cytokine-cytokine receptor interaction:</b> LIF, FASLG, MET</p> <p><b>TGF-beta signaling pathway:</b> MAPK1</p> <p><b>MAPK signaling pathway:</b> IKBKB, MAP3K11, MAPK1, AKT1, FASLG, MAPK14, MAPK8, MAPK9, NFKB1</p> <p><b>Osteoclast differentiation:</b> IKBKB, JUNB, MAPK1, AKT1, MAPK14, MAPK8, MAPK9, NFKB1</p> <p><b>Oocyte meiosis:</b> MAPK1</p> <p><b>mTOR signaling pathway:</b> IKBKB, HIF1A, MAPK1, AKT1, PTEN</p> <p><b>Metabolic pathways:</b> FASN, ALOX5, COX8A, CYP2A6</p> <p><b>VEGF signaling pathway:</b> MAPK1, AKT1, MAPK14</p> |
| mir-199 | 19p13.2 | hsa-miR-199a* | miR-199a-3p | -8.274 | <p><b>Cell cycle:</b> RB1</p> <p><b>p53 signaling pathway:</b> PTEN</p> <p><b>PI3K-Akt signaling pathway:</b> COMP, IKBKB, AKT1, NFKB1, PIK3CA, MET, MTOR, MAPK1, PTEN</p> <p><b>Wnt signaling pathway:</b> MAPK8, MAPK9</p> <p><b>Adhesion:</b> MAPK8, MAPK9, COMP, AKT1, PIK3CA, MET, MAPK1, PTEN</p> <p><b>NF- kappa B signaling pathway:</b> IKBKB, NFKB1, TNF</p> <p><b>HIF-1 signaling pathway:</b> AKT1, NFKB1, PIK3CA, MTOR, MAPK1</p> <p><b>Apoptosis:</b> IKBKB, AKT1, NFKB1, PIK3CA, TNF</p> <p><b>ErbB signaling pathway:</b> MAPK8, MAPK9, AKT1, PIK3CA, MTOR, MAPK1</p> <p><b>GnRH signaling pathway:</b> MAPK8, MAPK9, MAPK1, MAPK14</p> <p><b>Chemokine signaling pathway:</b> IKBKB, AKT1, NFKB1, PIK3CA, MAPK1</p> <p><b>Adipocytokine signaling pathway:</b> MAPK8, MAPK9, IKBKB, AKT1, NFKB1, MTOR, TNF</p> <p><b>Cytokine-cytokine receptor interaction:</b> BMP2, MET, TNF</p>                                                                                                                                    |

|         |        |              |            |        |                                                                                                                                                                                                                                                                                                                                                                                                                                                                                                                                                                                                                                                                                                                                                                                                                                                                                                                                                                                                                                                                                                                                                                                                                                                                                                                   |
|---------|--------|--------------|------------|--------|-------------------------------------------------------------------------------------------------------------------------------------------------------------------------------------------------------------------------------------------------------------------------------------------------------------------------------------------------------------------------------------------------------------------------------------------------------------------------------------------------------------------------------------------------------------------------------------------------------------------------------------------------------------------------------------------------------------------------------------------------------------------------------------------------------------------------------------------------------------------------------------------------------------------------------------------------------------------------------------------------------------------------------------------------------------------------------------------------------------------------------------------------------------------------------------------------------------------------------------------------------------------------------------------------------------------|
|         |        |              |            |        | <p><b>TGF-beta signaling pathway:</b> BMP2, COMP, MAPK1, TNF</p> <p><b>MAPK signaling pathway:</b> MAPK8, MAPK9, IKBKB, AKT1, NFKB1, MAPK1, TNF, MAPK14</p> <p><b>Osteoclast differentiation:</b> MAPK8, MAPK9, IKBKB, AKT1, NFKB1, PIK3CA, MAPK1, TNF, MAPK14</p> <p><b>mTOR signaling pathway:</b> IKBKB, AKT1, PIK3CA, MTOR, MAPK1, PTEN, TNF</p> <p><b>Metabolic pathways:</b> CYP2A6, COX8A</p> <p><b>VEGF signaling pathway:</b> AKT1, PIK3CA, MAPK1, MAPK14</p>                                                                                                                                                                                                                                                                                                                                                                                                                                                                                                                                                                                                                                                                                                                                                                                                                                            |
| mir-214 | 1q24.3 | hsa-miR-214* | miR-214-5p | -2.869 | <p><b>Cell cycle:</b> CDKN1A, MYC, CCND2</p> <p><b>p53 signaling pathway:</b> PTEN, CDKN1A, CCND2</p> <p><b>PI3K-Akt signaling pathway:</b> PTEN, AKT1, NOS3, VEGFA, CDKN1A, IKBKB, MYC, NRAS</p> <p><b>Wnt signaling pathway:</b> APC, CTNNB1, MYC, CCND2, JUN, MAPK8</p> <p><b>Adhesion:</b> BIRC3, PTEN, AKT1, VEGFA, CTNNB1, PAK1, CCND2, JUN, MAPK8</p> <p><b>NF- kappa B signaling pathway:</b> BIRC3, IKBKB</p> <p><b>HIF-1 signaling pathway:</b> AKT1, NOS3, VEGFA, CDKN1A</p> <p><b>Apoptosis:</b> BIRC3, AKT1, IKBKB</p> <p><b>ErbB signaling pathway:</b> AKT1, CDKN1A, MYC, NRAS, PAK1, JUN, MAPK8</p> <p><b>GnRH signaling pathway:</b> NRAS, JUN, MAPK8, MAP2K3</p> <p><b>Chemokine signaling pathway:</b> AKT1, IKBKB, NRAS, PAK1</p> <p><b>Adipocytokine signaling pathway:</b> AKT1, IKBKB, MAPK8</p> <p><b>Cytokine-cytokine receptor interaction:</b> VEGFA, TGFBR2</p> <p><b>TGF-beta signaling pathway:</b> MYC, TGFBR2</p> <p><b>MAPK signaling pathway:</b> AKT1, IKBKB, MYC, NRAS, PAK1, TGFBR2, JUN, MAPK8, MAP2K3</p> <p><b>Osteoclast differentiation:</b> AKT1, IKBKB, TGFBR2, JUN, MAPK8</p> <p><b>mTOR signaling pathway:</b> PTEN, AKT1, VEGFA, IKBKB</p> <p><b>Metabolic pathways:</b> NOS3, ZNRD1, DCT, COX8A</p> <p><b>VEGF signaling pathway:</b> AKT1, NOS3, VEGFA, NRAS</p> |
| mir-214 | 1q24.3 | hsa-miR-214  | miR-214-3p | -3.834 | <p><b>Cell cycle:</b> CDKN1A, MYC, CCND2</p> <p><b>p53 signaling pathway:</b> PTEN, CDKN1A, CCND2</p>                                                                                                                                                                                                                                                                                                                                                                                                                                                                                                                                                                                                                                                                                                                                                                                                                                                                                                                                                                                                                                                                                                                                                                                                             |

|         |      |             |            |        |                                                                                                                                                                                                                                                                                                                                                                                                                                                                                                                                                                                                                                                                                                                                                                                                                                                                                                                                                                                                                                                                                                                                                                                                     |
|---------|------|-------------|------------|--------|-----------------------------------------------------------------------------------------------------------------------------------------------------------------------------------------------------------------------------------------------------------------------------------------------------------------------------------------------------------------------------------------------------------------------------------------------------------------------------------------------------------------------------------------------------------------------------------------------------------------------------------------------------------------------------------------------------------------------------------------------------------------------------------------------------------------------------------------------------------------------------------------------------------------------------------------------------------------------------------------------------------------------------------------------------------------------------------------------------------------------------------------------------------------------------------------------------|
|         |      |             |            |        | <p><b>PI3K-Akt signaling pathway:</b> PTEN, AKT1, NOS3, VEGFA, CDKN1A, IKBKB, MYC, NRAS, CCND2</p> <p><b>Wnt signaling pathway:</b> APC, CTNNB1, MYC, CCND2, JUN, MAPK8</p> <p><b>Adhesion:</b> BIRC3, PTEN, AKT1, VEGFA, CTNNB1, PAK1, CCND2, JUN, MAPK8</p> <p><b>NF- kappa B signaling pathway:</b> BIRC3, IKBKB</p> <p><b>HIF-1 signaling pathway:</b> AKT1, NOS3, VEGFA</p> <p><b>Apoptosis:</b> BIRC3, AKT1, IKBKB</p> <p><b>ErbB signaling pathway:</b> AKT1, CDKN1A, MYC, NRAS, PAK1, JUN, MAPK8</p> <p><b>GnRH signaling pathway:</b> NRAS, JUN, MAPK8, MAP2K3</p> <p><b>Chemokine signaling pathway:</b> AKT1, IKBKB, NRAS, PAK1</p> <p><b>Adipocytokine signaling pathway:</b> AKT1, MAPK8</p> <p><b>Cytokine-cytokine receptor interaction:</b> VEGFA, TGFBR2</p> <p><b>TGF-beta signaling pathway:</b> MYC, TGFBR2</p> <p><b>MAPK signaling pathway:</b> AKT1, IKBKB, MYC, NRAS, PAK1, TGFBR2, JUN, MAPK8, MAP2K3</p> <p><b>Osteoclast differentiation:</b> AKT1, IKBKB, TGFBR2, JUN, MAPK8</p> <p><b>mTOR signaling pathway:</b> PTEN, AKT1, VEGFA, IKBKB</p> <p><b>Metabolic pathways:</b> NOS3, ZNRD1, DCT, COX8A</p> <p><b>VEGF signaling pathway:</b> AKT1, NOS3, VEGFA, NRAS</p> |
| mir-218 | 5q34 | hsa-miR-218 | miR-218-5p | -3.257 | <p><b>Cell cycle:</b> CDKN1B</p> <p><b>PI3K-Akt signaling pathway:</b> NFKB1, LAMB3, CD19, COL1A1, IKBKB, VEGFA, LAMB3, PIK3R2, EFNA1</p> <p><b>Adhesion:</b> LAMB3, COL1A1, PXN, VEGFA, CRK, LAMB3, PIK3R2, SRC, ERBB2, ACTN1, COL4A1</p> <p><b>NF- kappa B signaling pathway:</b> NFKB1, IKBKB</p> <p><b>HIF-1 signaling pathway:</b> NFKB1, VEGFA, PIK3R2, ERBB2</p> <p><b>Apoptosis:</b> NFKB1, IKBKB, PIK3R2</p> <p><b>ErbB signaling pathway:</b> CRK, PIK3R2, SRC, ERBB2, CDKN1B</p> <p><b>GnRH signaling pathway:</b> SRC</p> <p><b>Chemokine signaling pathway:</b> NFKB1, IKBKB, PXN, CRK, PIK3R2, SRC</p> <p><b>Adipocytokine signaling pathway:</b> NFKB1, IKBKB</p> <p><b>Cytokine-cytokine receptor interaction:</b> VEGFA</p>                                                                                                                                                                                                                                                                                                                                                                                                                                                        |

|         |        |                |              |        |                                                                                                                                                                                                                                                                                                                                                                                                                                                                                                                                                                                                                                                                                                                                                                                                                                                                                                                                                                                                                                                                                                                                                                                                                                                                                                                                                                                                                                                                                                                                                                                                                                                     |
|---------|--------|----------------|--------------|--------|-----------------------------------------------------------------------------------------------------------------------------------------------------------------------------------------------------------------------------------------------------------------------------------------------------------------------------------------------------------------------------------------------------------------------------------------------------------------------------------------------------------------------------------------------------------------------------------------------------------------------------------------------------------------------------------------------------------------------------------------------------------------------------------------------------------------------------------------------------------------------------------------------------------------------------------------------------------------------------------------------------------------------------------------------------------------------------------------------------------------------------------------------------------------------------------------------------------------------------------------------------------------------------------------------------------------------------------------------------------------------------------------------------------------------------------------------------------------------------------------------------------------------------------------------------------------------------------------------------------------------------------------------------|
|         |        |                |              |        | <p><b>TGF-beta signaling pathway:</b> SP1</p> <p><b>MAPK signaling pathway:</b> NFKB1, IKBKB, CRK</p> <p><b>Osteoclast differentiation:</b> NFKB1, IKBKB, PIK3R2</p> <p><b>mTOR signaling pathway:</b> IKBKB, VEGFA, PIK3R2, RICTOR, AC026713.5</p> <p><b>Metabolic pathways:</b> PDXP, COX8A, EBP, GLCE, GLB1, ATP6V0E</p> <p><b>VEGF signaling pathway:</b> PXN, VEGFA, PIK3R2, SRC</p>                                                                                                                                                                                                                                                                                                                                                                                                                                                                                                                                                                                                                                                                                                                                                                                                                                                                                                                                                                                                                                                                                                                                                                                                                                                           |
| mir-218 | 5q34   | hsa-miR-218-2* | miR-218-2-3p | -1.540 | <b>No pathway for validated genes</b>                                                                                                                                                                                                                                                                                                                                                                                                                                                                                                                                                                                                                                                                                                                                                                                                                                                                                                                                                                                                                                                                                                                                                                                                                                                                                                                                                                                                                                                                                                                                                                                                               |
| mir-221 | Xp11.3 | hsa-miR-221*   | miR-221-5p   | -3.277 | <p><b>Cell cycle:</b> CDKN1C, CDKN1B, CDK2, MYC, CDKN1A, MDM2, TP53, SKP2, ATR, CCND1</p> <p><b>p53 signaling pathway:</b> BBC3, PTEN, CDK2, CDKN1A, MDM2, TP53, CASP3, BAX, ATR, CCND1, CCNG1</p> <p><b>PI3K-Akt signaling pathway:</b> KIT, JAK3, CDKN1B, NGF, AKT1, PTEN, MAPK3, JAK2, BRCA1, CDK2, MTOR, BCL2, BCL2L11, MYC, CDKN1A, KDR, MDM2, SYK, TP53, FOXO3, TEK, TKR4, DDIT4, CSF1R, PIK3CA, EPOR, AKT3, IFNA1, MYB, MAP2K1, JAK1, CCND1, PDGFD, PDGFRA</p> <p><b>Wnt signaling pathway:</b> MYC, TP53, MAPK8, KRAS, DKK2, CCND1</p> <p><b>Adhesion:</b> AKT1, PTEN, MAPK3, BCL2, KDR, MAPK8, PIK3CA, ERBB2, AKT3, SRC, MAP2K1, CCND1, PDGFD, PDGFRA</p> <p><b>NF- kappa B signaling pathway:</b> VCAM1, NFKBIA, BCL2, ICAM1, SYK, CXCL12, TKR4, BTK, TNF, IL1B, IRAK1</p> <p><b>HIF-1 signaling pathway:</b> CDKN1B, AKT1, MAPK3, MTOR, BCL2, CDKN1A, IFNG, TEK, TKR4, PIK3CA, ERBB2, AKT3, TFRC, MAP2K1</p> <p><b>Apoptosis:</b> NGF, AKT1, NFKBIA, TNFSF10, BCL2, TP53, CASP3, PIK3CA, TNF, BAX, AKT3, IL1B, IRAK1</p> <p><b>ErbB signaling pathway:</b> CDKN1B, AKT1, MAPK3, MTOR, MYC, CDKN1A, MAPK8, PIK3CA, KRAS, ERBB2, AKT3, SRC, MAP2K1, STAT5A</p> <p><b>GnRH signaling pathway:</b> MAPK3, MAPK8, KRAS, SRC, MAP2K1</p> <p><b>Chemokine signaling pathway:</b> JAK3, AKT1, CCL2, CXCR4, MAPK3, JAK2, NFKBIA, CXCL12, FOXO3, PIK3CA, KRAS, AKT3, SRC, MAP2K1, STAT1, STAT2</p> <p><b>Adipocytokine signaling pathway:</b> AKT1, JAK2, NFKBIA, MTOR, MAPK8, TNF, CD36, AKT3</p> <p><b>Cytokine-cytokine receptor interaction:</b> KIT, CCL2, CXCR4, FLT3, TNFSF10, KDR, CXCL12, IFNG, CSF1R, TNF, EPOR, IFNA1, IL1B, PDGFD,</p> |

|         |        |             |            |        |                                                                                                                                                                                                                                                                                                                                                                                                                                                                                                                                                                                                                                                                                                                                                                                                                                                                                                                                                                                                                                                                                                                                                               |
|---------|--------|-------------|------------|--------|---------------------------------------------------------------------------------------------------------------------------------------------------------------------------------------------------------------------------------------------------------------------------------------------------------------------------------------------------------------------------------------------------------------------------------------------------------------------------------------------------------------------------------------------------------------------------------------------------------------------------------------------------------------------------------------------------------------------------------------------------------------------------------------------------------------------------------------------------------------------------------------------------------------------------------------------------------------------------------------------------------------------------------------------------------------------------------------------------------------------------------------------------------------|
|         |        |             |            |        | <p>PDGFRA</p> <p><b>TGF-beta signaling pathway:</b> MAPK3, MYC, IFNG, TNF</p> <p><b>MAPK signaling pathway:</b> NGF, AKT1, MAPK3, MYC, STMN1, TP53, CASP3, MAPK8, KRAS, TNF, AKT3, IL1B, MAP2K1, PDGFRA</p> <p><b>Osteoclast differentiation:</b> AKT1, MAPK3, NFKBIA, SYK, IFNG, MAPK8, BTK, CSF1R, PIK3CA, TNF, SOCS1, TYK2, AKT3, IL1B, MAP2K1, JAK1, STAT1, STAT2</p> <p><b>Oocyte meiosis:</b> MAPK3, CDK2, MAP2K1</p> <p><b>mTOR signaling pathway:</b> AKT1, PTEN, MAPK3, MTOR, DDIT4, PIK3CA, TNF, AKT3</p> <p><b>Metabolic pathways:</b> COX8A, DNMT1, AMACR, MDH2, PSAT1</p> <p><b>VEGF signaling pathway:</b> AKT1, MAPK3, KDR, PIK3CA, KRAS, AKT3, SRC, MAP2K1</p> <p><b>PPAR signaling pathway:</b> FABP4, CD36</p>                                                                                                                                                                                                                                                                                                                                                                                                                              |
| mir-221 | Xp11.3 | hsa-miR-221 | miR-221-3p | -3.080 | <p><b>Cell cycle:</b> CDKN1C, CDKN1B, CDK2, MYC, CDKN1A, MDM2, TP53, SKP2, ATR, CCND1</p> <p><b>p53 signaling pathway:</b> BBC3, PTEN, CDK2, CDKN1A, MDM2, TP53, CASP3, BAX, ATR, CCND1, CCNG1</p> <p><b>PI3K-Akt signaling pathway:</b> KIT, JAK3, CDKN1B, NGF, AKT1, PTEN, MAPK3, JAK2, BRCA1, CDK2, MTOR, BCL2, BCL2L11, MYC, CDKN1A, KDR, MDM2, SYK, TP53, FOXO3, TEK, TLR4, DDIT4, CSF1R, PIK3CA, KRAS, EPOR, AKT3, IFNA1, MYB, MAP2K1, JAK1, CCND1, PDGFD, PDGFRA</p> <p><b>Wnt signaling pathway:</b> MYC, TP53, MAPK8, DKK2, CCND1</p> <p><b>Adhesion:</b> AKT1, PTEN, MAPK3, BCL2, KDR, MAPK8, PIK3CA, ERBB2, AKT3, MAP2K1, CCND1, PDGFD, PDGFRA</p> <p><b>NF- kappa B signaling pathway:</b> VCAM1, NFKBIA, BCL2, ICAM1, SYK, CXCL12, TLR4, BTK, TNF, IL1B, IRAK1</p> <p><b>HIF-1 signaling pathway:</b> CDKN1B, AKT1, MAPK3, MTOR, BCL2, CDKN1A, IFNG, TEK, TLR4, PIK3CA, ERBB2, AKT3, TFRC, MAP2K1</p> <p><b>Apoptosis:</b> NGF, AKT1, NFKBIA, TNFSF10, BCL2, TP53, CASP3, PIK3CA, TNF, BAX, AKT3, IL1B, IRAK1</p> <p><b>ErbB signaling pathway:</b> CDKN1B, AKT1, MAPK3, MTOR, MYC, CDKN1A, MAPK8, PIK3CA, KRAS, ERBB2, AKT3, MAP2K1, STAT5A</p> |

|         |        |             |            |        |                                                                                                                                                                                                                                                                                                                                                                                                                                                                                                                                                                                                                                                                                                                                                                                                                                                                                                                                                                                                                                                                                                                                                                                      |
|---------|--------|-------------|------------|--------|--------------------------------------------------------------------------------------------------------------------------------------------------------------------------------------------------------------------------------------------------------------------------------------------------------------------------------------------------------------------------------------------------------------------------------------------------------------------------------------------------------------------------------------------------------------------------------------------------------------------------------------------------------------------------------------------------------------------------------------------------------------------------------------------------------------------------------------------------------------------------------------------------------------------------------------------------------------------------------------------------------------------------------------------------------------------------------------------------------------------------------------------------------------------------------------|
|         |        |             |            |        | <p><b>GnRH signaling pathway:</b> MAPK3, MAPK8, KRAS, MAP2K1</p> <p><b>Chemokine signaling pathway:</b> JAK3, AKT1, CCL2, CXCR4, MAPK3, JAK2, NFKBIA, CXCL12, FOXO3, PIK3CA, KRAS, AKT3, MAP2K1, STAT1</p> <p><b>Adipocytokine signaling pathway:</b> AKT1, JAK2, NFKBIA, MTOR, MAPK8, TNF, CD36, AKT3</p> <p><b>Cytokine-cytokine receptor interaction:</b> KIT, CCL2, CXCR4, FLT3, TNFSF10, KDR, CXCL12, IFNG, CSF1R, TNF, EPOR, IFNA1, IL1B, PDGFD, PDGFRA</p> <p><b>TGF-beta signaling pathway:</b> MAPK3, MYC, IFNG, TNF</p> <p><b>MAPK signaling pathway:</b> NGF, AKT1, MAPK3, MYC, STMN1, TP53, CASP3, MAPK8, KRAS, TNF, AKT3, IL1B, MAP2K1, PDGFRA, FOS</p> <p><b>Osteoclast differentiation:</b> AKT1, MAPK3, NFKBIA, SYK, IFNG, MAPK8, BTK, CSF1R, PIK3CA, TNF, SOCS1, TYK2, AKT3, IL1B, MAP2K1, JAK1, STAT1, STAT2</p> <p><b>Oocyte meiosis:</b> MAPK3, CDK2, MAP2K1</p> <p><b>mTOR signaling pathway:</b> AKT1, PTEN, MAPK3, MTOR, DDIT4, PIK3CA, TNF, AKT3</p> <p><b>Metabolic pathways:</b> COX8A, DNMT1, AMACR, MDH2, PSAT1</p> <p><b>VEGF signaling pathway:</b> AKT1, MAPK3, KDR, PIK3CA, KRAS, AKT3, MAP2K1</p> <p><b>PPAR signaling pathway:</b> FABP4, CD36</p> |
| mir-322 | Xq26.3 | hsa-miR-424 | miR-424-5p | -3.657 | <p><b>Cell cycle:</b> CCNE2, E2F3, CCND1, CCND3, CDC25A, E2F1, SMAD3, WEE1, CDC14A, CDKN1A, CCNE1, CHEK1, CDK6</p> <p><b>p53 signaling pathway:</b> CCNE2, CCND1, CCND3, SIAH1, CDKN1A, CCNE1, CHEK1, CDK6</p> <p><b>PI3K-Akt signaling pathway:</b> CCNE2, MAP2K1, CCND1, CCND3, EGFR, FGFR1, MYB, AKT1, CREB1, CDKN1A, CCNE1, ATF2, CDK6</p> <p><b>Wnt signaling pathway:</b> CCND1, CCND3, SMAD3, SIAH1, JUN, MAPK9</p> <p><b>Adhesion:</b> MAP2K1, CCND1, CCND3, EGFR, PAK3, AKT1, JUN, MAPK9</p> <p><b>HIF-1 signaling pathway:</b> MAP2K1, EGFR, AKT1, CUL2, HIF1A, CDKN1A</p> <p><b>Apoptosis:</b> AKT1</p> <p><b>ErbB signaling pathway:</b> MAP2K1, EGFR, PAK3, AKT1, JUN, CDKN1A, MAPK9</p> <p><b>GnRH signaling pathway:</b> MAP2K1, EGFR, ITPR1, JUN, MAPK9</p>                                                                                                                                                                                                                                                                                                                                                                                                          |

|         |        |              |            |        |                                                                                                                                                                                                                                                                                                                                                                                                                                                                                                                                                                                                                                                                                                                                                                                                                                                                                                                                                                                                                                                                                                                                                                                                                                                                                                                                                               |
|---------|--------|--------------|------------|--------|---------------------------------------------------------------------------------------------------------------------------------------------------------------------------------------------------------------------------------------------------------------------------------------------------------------------------------------------------------------------------------------------------------------------------------------------------------------------------------------------------------------------------------------------------------------------------------------------------------------------------------------------------------------------------------------------------------------------------------------------------------------------------------------------------------------------------------------------------------------------------------------------------------------------------------------------------------------------------------------------------------------------------------------------------------------------------------------------------------------------------------------------------------------------------------------------------------------------------------------------------------------------------------------------------------------------------------------------------------------|
|         |        |              |            |        | <p><b>Chemokine signaling pathway:</b> MAP2K1, AKT1</p> <p><b>Adipocytokine signaling pathway:</b> AKT1, RXRA, MAPK9</p> <p><b>Cytokine-cytokine receptor interaction:</b> FLT3, EGFR</p> <p><b>TGF-beta signaling pathway:</b> SMAD3</p> <p><b>MAPK signaling pathway:</b> MAP2K1, RASA1, EGFR, FGFR1, AKT1, JUN, MAPK9, ATF2</p> <p><b>Osteoclast differentiation:</b> MAP2K1, AKT1, FOSB, CREB1, JUN, MAPK9</p> <p><b>Oocyte meiosis:</b> CCNE2, MAP2K1, ITPR1, CCNE1</p> <p><b>mTOR signaling pathway:</b> AKT1, HIF1A</p> <p><b>VEGF signaling pathway:</b> MAP2K1, AKT1</p> <p><b>PPAR signaling pathway:</b> RXRA</p>                                                                                                                                                                                                                                                                                                                                                                                                                                                                                                                                                                                                                                                                                                                                  |
| mir-322 | Xq26.3 | hsa-miR-424* | miR-424-3p | -3.934 | <p><b>Cell cycle:</b> CCNE2, E2F3, CCND1, CCND3, CDC25A, E2F1, SMAD3, WEE1, CDC14A, CDKN1A, CCNE1, CHEK1, CDK6</p> <p><b>p53 signaling pathway:</b> CCNE2, CCND1, CCND3, SIAH1, CDKN1A, CCNE1, CHEK1, CDK6</p> <p><b>PI3K-Akt signaling pathway:</b> CCNE2, MAP2K1, CCND1, CCND3, EGFR, FGFR1, MYB, AKT1, CREB1, CDKN1A, CCNE1, ATF2, CDK6</p> <p><b>Wnt signaling pathway:</b> CCND1, CCND3, SMAD3, SIAH1, JUN, MAPK9</p> <p><b>Adhesion:</b> MAP2K1, CCND1, CCND3, EGFR, PAK3, AKT1, JUN, MAPK9</p> <p><b>HIF-1 signaling pathway:</b> MAP2K1, EGFR, AKT1, CUL2, HIF1A, CDKN1A</p> <p><b>Apoptosis:</b> AKT1</p> <p><b>ErbB signaling pathway:</b> MAP2K1, EGFR, PAK3, AKT1, JUN, CDKN1A, MAPK9</p> <p><b>GnRH signaling pathway:</b> MAP2K1, EGFR, ITPR1, JUN, MAPK9</p> <p><b>Chemokine signaling pathway:</b> MAP2K1, AKT1</p> <p><b>Adipocytokine signaling pathway:</b> AKT1, RXRA, MAPK9</p> <p><b>Cytokine-cytokine receptor interaction:</b> FLT3, EGFR</p> <p><b>TGF-beta signaling pathway:</b> SMAD3</p> <p><b>MAPK signaling pathway:</b> MAP2K1, RASA1, EGFR, FGFR1, AKT1, JUN, MAPK9, ATF2</p> <p><b>Osteoclast differentiation:</b> MAP2K1, AKT1, FOSB, CREB1, JUN, MAPK9</p> <p><b>Oocyte meiosis:</b> CCNE2, MAP2K1, ITPR1, CCNE1</p> <p><b>mTOR signaling pathway:</b> AKT1, HIF1A</p> <p><b>VEGF signaling pathway:</b> MAP2K1, AKT1</p> |



|                                                  |         |             |            |        |                                                                                                                                                                                                                                                                                                                                                                                                                                                                                                                                                                                                                                                                                                                |
|--------------------------------------------------|---------|-------------|------------|--------|----------------------------------------------------------------------------------------------------------------------------------------------------------------------------------------------------------------------------------------------------------------------------------------------------------------------------------------------------------------------------------------------------------------------------------------------------------------------------------------------------------------------------------------------------------------------------------------------------------------------------------------------------------------------------------------------------------------|
|                                                  |         |             |            |        | PPAR signaling pathway: RXRA                                                                                                                                                                                                                                                                                                                                                                                                                                                                                                                                                                                                                                                                                   |
| <b>(III) Pairs with reverse regulation (n=2)</b> |         |             |            |        |                                                                                                                                                                                                                                                                                                                                                                                                                                                                                                                                                                                                                                                                                                                |
| mir-139                                          | 11q13.4 | hsa-miR-139 | miR-139-5p | -9.810 | <p><b>Cell cycle:</b> CDKN1B, MYC</p> <p><b>p53 signaling pathway:</b> PTEN</p> <p><b>PI3K-Akt signaling pathway:</b> PTEN, CDKN1B, BRCA1, MYC</p> <p><b>Wnt signaling pathway:</b> ROCK2, MYC</p> <p><b>Adhesion:</b> ROCK2, PTEN</p> <p><b>NF- kappa B signaling pathway:</b> PTGS2</p> <p><b>HIF-1 signaling pathway:</b> CDKN1B</p> <p><b>ErbB signaling pathway:</b> CDKN1B, MYC</p> <p><b>GnRH signaling pathway:</b></p> <p><b>Chemokine signaling pathway:</b> ROCK2</p> <p><b>TGF-beta signaling pathway:</b> ROCK2, MYC</p> <p><b>MAPK signaling pathway:</b> MYC</p> <p><b>mTOR signaling pathway:</b> PTEN</p> <p><b>Metabolic pathways:</b> PTGS2</p> <p><b>VEGF signaling pathway:</b> PTGS2</p> |
| mir-139                                          | 11q13.4 | -           | miR-139-3p | 1.943  | <p><b>Cell cycle:</b> CDKN1B, MYC</p> <p><b>PI3K-Akt signaling pathway:</b> CDKN1B, MYC, BRCA1</p> <p><b>Wnt signaling pathway:</b> ROCK2, MYC</p> <p><b>Adhesion:</b> ROCK2</p> <p><b>HIF-1 signaling pathway:</b> CDKN1B</p> <p><b>ErbB signaling pathway:</b> CDKN1B, MYC</p> <p><b>Chemokine signaling pathway:</b> ROCK2</p> <p><b>TGF-beta signaling pathway:</b> ROCK2, MYC</p> <p><b>MAPK signaling pathway:</b> MYC</p>                                                                                                                                                                                                                                                                               |
| mir-876                                          | 9p21.1  | -           | miR-876-5p | -3.797 | <b>No pathway for validated genes</b>                                                                                                                                                                                                                                                                                                                                                                                                                                                                                                                                                                                                                                                                          |
| mir-876                                          | 9p21.1  | -           | miR-876-3p | 1.510  | <b>No pathway for validated genes</b>                                                                                                                                                                                                                                                                                                                                                                                                                                                                                                                                                                                                                                                                          |

<sup>1</sup> \*\*  $p < 0.01$ , \*  $p < 0.05$ . <sup>2</sup>Validated targets sourced mainly from miRWalk and NCBI website, and also from miRTarBase and Tarbase
